# Supplementary material
Source: PubMed Central journal article supplement (PMC6883779)
Supplement: pnas.1910471116.sapp.pdf [file pnas.1910471116.sapp.pdf]

# PNAS

[www.pnas.org](http://www.pnas.org)

**SUPPORTING INFORMATION:**

**Introgression drives repeated evolution of winter coat color polymorphism in hares**

Iwona Giska, Liliana Farelo, João Pimenta, Fernando A. Seixas, Mafalda S. Ferreira, João P. Marques, Inês Miranda, Jérôme Letty, Hannes Jenny, Klaus Hackländer, Eyðfinn Magnussen, José Melo-Ferreira

*Corresponding author:*

José Melo-Ferreira ([jmeloferreira@cibio.up.pt](mailto:jmeloferreira@cibio.up.pt))

**This PDF file includes:**

Supplementary Methods

Figs. S1 to S12

Tables S1 to S11

References for SI

## SUPPLEMENTARY METHODS

### Samples and whole genome sequencing

We generated whole-genome sequencing data at individual low coverage for 59 mountain hares (*Lepus timidus*) collected from the Faroe Islands (N=20 diploid individuals), Fennoscandia (N=19; Sweden, Finland, Norway) and the Alps (N=20; Austria, Italy, France, Switzerland) (Tables S1 and S2). Genomic DNA was extracted from ear or organ tissues with PureLink Genomic DNA Mini Kit (Invitrogen) and quantified with Qubit fluorometer (Invitrogen). Double-indexed libraries were prepared according to a modified version of the protocol of Meyer and Kircher (1). Briefly, genomic DNA was sheared with Bioruptor® Pico and up to 500 ng of sheared DNA was used for blunt-end repair, adapter ligation and adapter fill-in. Indexing polymerase chain reactions (PCRs) was performed in 50 µl reactions containing 1X Herculase II reaction buffer, 250 µM each dNTP, 0.2 µM P5 and P7 indexing primers, 0.5 µl Herculase II polymerase and 3.5 µl DNA template. The PCR profiles were as follows: initial denaturation 98°C – 2 min, 10 or 16 cycles: 98°C – 20 s, 60°C – 20 s, 72°C – 20 s, and final elongation 72°C - 5 min. The indexed libraries were quantified with quantitative PCR (qPCR), pooled and sequenced at low individual coverage in five lanes of an Illumina HiSeq 1500 sequencer in three separate runs (125 bp paired-end) at CIBIO-InBIO's New-Gen sequencing platform, Portugal.

In addition, whole-genome sequencing data at higher individual coverage from specimens from six *Lepus* species was analyzed, representing mountain hares (*L. timidus*) from the Faroe Islands, the Alps and Fennoscandia, European brown hares (*L. europaeus*) from Iberia and central Europe, two Iberian hares (*L. granatensis*) from the Iberian Peninsula, one broom hare (*L. castroviejo*) from the Iberian Peninsula, one winter-brown and two winter-white snowshoe hares (*L. americanus*), and two black-tailed jackrabbits (*L. californicus*) (from 2, 3, 4 and this work) (Table S3).

### Sequence data processing

The raw Illumina reads of whole-genome low coverage sequence data for 59 mountain hares were demultiplexed and their quality was assessed with FastQC (<https://www.bioinformatics.babraham.ac.uk/projects/fastqc/>). We removed adapters and filtered low quality reads using Trimmomatic (5) with the following settings: TRAILING:15, SLIDINGWINDOW:4:15,

MINLEN:30. The cleaned read pairs were mapped to a hare pseudo-reference (3) using bwa-mem with default settings (6). This reference was built by replacing in the European rabbit (*Oryctolagus cuniculus*) reference genome fixed differences to the group of three hare species (*L. americanus*, *L. granatensis* and *L. timidus*) (3). The European rabbit is related to hares (~11.8 million years divergence; 7) and its reference genome has high quality chromosome-level assembly and annotation (8). PCR duplicates were removed with PICARD (<http://broadinstitute.github.io/picard/>) and reads were locally realigned with GATK IndelRealigner (9). Then, for each individual, we calculated mean coverage and the proportion of properly mapped reads using Samtools (10). Two specimens with depth >2X were randomly subsampled to <1.5X to avoid overrepresentation of individual samples (Table S2). Sequencing resulted in a total coverage of 16.8X for Faroese hares, 17.1X for Alpine hares, and 18.0X for Fennoscandian hares. The resulting BAM files were used as inputs for further analyses. Taking advantage of sequencing individually barcoded DNA libraries, for all analyses using low coverage data, only sites represented by at least six different individuals from each population were used, to avoid strong biases in the representation the sequenced specimens.

The raw reads of higher coverage data were processed as described above, except the Trimmomatic settings, which were as follows: TRAILING:20, SLIDINGWINDOW:4:20, MINLEN:36. Adapters were removed with cutadapt (11). SNP calling for the whole chromosome 4 was performed with Samtools (mpileup) and Bcftools (call -m) separately for each individual. Resulting vcf files were filtered (bcftools filter) for minimum depth of 6X, maximum depth of 2 times the average depth, and a minimum QUAL of 50.

## **Genetic diversity**

We used PoPoolation (12) to calculate genome-wide nucleotide diversity ( $\pi$ ) and theta ( $\theta$ ) for each population separately (Fig. S8C). For each population, mpileup files with masked SNPs in the proximity of indels (--indel-window 5) were used as input to estimate diversity indices in 200 kb non-overlapping windows, using the following parameters: --min-count 4 --min-coverage 10 --max-coverage 51 --min-qual 20 --min-covered-fraction 0.25.

## **Population structure and evolutionary relationship**

Principal component analysis (PCA) based on low individual coverage data was performed with ANGSD (13), using a single-read sampling approach (IBS) appropriate for low-depth data (Fig. S1A). Genotype-likelihoods were calculated using the Samtools method, as implemented in ANGSD (-GL 1). For all ANGSD analyses we used the following filtering criteria: -uniqueOnly 1 -remove\_bads 1 -trim 0 -C 50 -baq 2 -minMapQ 20 -minQ 20 -SNP\_pval 1e-6. The PCA was based on 123,995 SNPs sampled every 20 kb with PLINK --bp-space command (14) to reduce non-independence due to linkage. The proportion of variance explained by each component was calculated with the R function *prcomp*.

A neighbor-joining tree (NJ) was constructed based on pairwise genetic distances between individuals (Fig. S1B). The distances were estimated with ngsDist (15) and ngsTools (16) from genotype posterior probabilities generated with ANGSD (-doGeno 8 -doPost 1), based on 127,413 polymorphic sites sampled at least every 20 kb. We performed 100 bootstrapped replicates by randomly sampling with replacement blocks of 100 SNPs (-n\_boot\_rep 100 -boot\_block\_size 100). Trees were generated using FastME (17).

We also constructed a population tree based on allele frequencies (Fig. 1D), as implemented in TreeMix (18). First, allele frequencies were estimated with ANGSD, using the European rabbit genome reference (OryCun2.0, Ensembl, release 80) to determine the ancestral state (-doMajorMinor 5 -doMaf 1). Then, the ANGSD output was converted into the TreeMix input (allele counts at each SNP) with custom python scripts (available at <https://github.com/evochange/far>), sampling sites at least every 20 kb, resulting in 136,834 SNPs. TreeMix was run 1,000 times.

For both the NJ and TreeMix analyses, the snowshoe hare (*L. americanus*) was used as outgroup. Trees were summarized with SumTrees of the DendroPy library (19) and visualized with FigTree (<http://tree.bio.ed.ac.uk/software/figtree/>).

### **Approximate Bayesian Computation**

The introduction of mountain hares into the Faroe Islands was modelled using Approximate Bayesian Computation (ABC; 20). The demographic scenario was built in accordance with the historical information about the introduction, but with wide uniform prior distributions to allow parameter inference (Table S4). Briefly, it consisted of an ancestral population of size  $N_{FSC}$  (effective population size of the Fennoscandia population) that split at time  $T_i$  generations ago (the time of the introduction into the Faroe Islands; a generation

length of two years was considered; 21); while the Fennoscandian effective population size ( $N_{FSC}$ ) was kept constant, a growth rate of  $g$  was set for the Faroese population, from the time of introduction ( $T_i$ ) until the present (effective population size  $N_{FAR}$ ). Simulations were performed under a mutation rate estimated from the data, with a transition rate set to 0.33.

The data was characterized by the following summary statistics: number of segregating sites ( $S$ ), nucleotide diversity ( $\theta_\pi$ ), Watterson's theta ( $\theta_{\text{Watterson}}$ ), and Tajima's  $D$  per population, and  $F_{ST}$  between populations, including their means, standard deviations and medians (27 summary statistics). The summary statistics were calculated using PoPoolation2 (22) and npstat (23), pooling the sequencing data for each population. For the empirical dataset, we removed sites overlapping coding regions and repeats, sites with a base quality  $<30$ , and reads with a mapping quality  $<30$ . Only sites represented by at least 10 individuals in each population (determined by the individual barcodes) and with coverage between 10X and 51X per population were retained. The summary statistics were calculated from independent windows (at least 100 kb apart) of 2 kb with at least 85% of the window covered, which resulted in 501 windows. Demographic inference is sensible to the inclusion of sequencing errors as rare variants (24, 25), and we thus filtered empirical and simulated datasets to include SNPs with at least three observations of the minor allele. This approach has been suggested to be preferable to the potential bias introduced by sequencing errors (26).

Simulations of the demographic model (Fig. 1E) were performed using fastsimcoal26 (27) with 100,000 replicates. We simulated 501 windows of 2 kb under a finite-site model, considering 20 diploid individuals (40 haploid) from FAR and 19 diploids (38 haploid) from FSC, as in our dataset. We generated Arlequin files in diploid formats (-g), outputting whole DNA sequences (-S). These files were converted to population bam files, that were used to produce mpileup and sync files, inputs for npstat and PoPoolation2. Summary statistics were calculated as for the empirical dataset, in 501 2 kb non-overlapping windows for each simulation.

Parameter estimation was performed using ABCtoolbox package (28). Summary statistics were transformed via Partial Least Squares (PLS), using the *PLS* R package (29), and the root mean squared error plots (RMSEP) were inspected to determine the number of PLS components. The marginal density P-value and the Tukey P-value, both based on 1,000 retained simulations (1% closest to the empirical data), were used to evaluate whether the model was able to reproduce the empirical summary statistics. While our approach did

not explicitly model the occurrence of sequencing errors, filtering the empirical and simulated datasets for minimum allele counts allowed recovering well the empirical statistics under our demographic scenario (marginal density P-value = 0.73; Tukey P-value = 0.74). We used the PLS transformed statistics to estimate demographic parameters by applying the ABC-GLM algorithm (30) and retaining 1% of the simulations closest to the observed data (Fig. S2, Table S4). Finally, the accuracy of parameter estimates was assessed by cross-validation, based on 1,000 random simulations for which the true parameter values were known (pseudo-observed datasets) (Fig. S3).

### **Detection of differentiation and association outliers**

Scans of differentiation were performed using an array of tests based either on pooled sequence data per population/phenotype (ensuring a minimum representation of six individuals) or from genotype likelihoods, as implemented in PoPoolation2 (22) and ANGSD (13), respectively.

A genome scan of Population Branch Statistic (PBS; 31) was performed in 20 kb non-overlapping windows (Fig. 2A). Given three structured populations (Fig. S1A) and the closer relationship of Faroese and Fennoscandian populations (Fig. 1D, Fig. S1B), this statistic is suited to identify localized strong allele frequency changes in the specific branch of the Faroese hares, which deviate from the genome-wide norm, and may result from recent selective sweeps (31). PBS was calculated in 20 kb non-overlapping windows, based on allele frequencies estimated from individual genotype likelihoods, as implemented in ANGSD (13). The European rabbit reference was used to determine the ancestral state (-anc). PBS values were plotted against chromosome position using the *qqman* R package.

Association tests based on allele frequency differences between cases and controls using genotype likelihoods were performed in ANGSD (-doAsso 1), setting the Faroese individuals (winter-grey phenotype) as cases and the remaining individuals (from Alps and Fennoscandia) as controls (Fig. S4E). For this analysis, additional filters for minimum (-setMinDepth 30) and maximum (setMaxDepth 150) depth were used. The resulting likelihood ratio statistic (LRT) was converted to  $-\log_{10}(P)$  values assuming a chi-square distribution with one degree of freedom. The mean  $-\log_{10}(P)$  values for windows of 100 SNPs were plotted against chromosome positions with a custom R script (available at <https://github.com/evochange/far>). The Bonferroni correction for multiple tests was used to determine the significance threshold, which was set to  $p < 6.15 \times 10^{-7}$ .

In addition, the scan was performed for single pairwise comparisons, i.e. Faroese hares vs. Alpine hares and Faroese hares vs. Fennoscandian hares, adjusting coverage and significance thresholds (Fig. S4).

For PoPoolation2 analyses, concatenated bam files were used to produce mpileup files with Samtools, removing reads with mapping quality lower than 20. The mpileup files were then converted to synchronized files requiring base qualities of at least 20 and masking 5 bp on either side of inferred insertion-deletions (--indel-window 5). The synchronized file was then used as an input to calculate  $F_{ST}$  (--karlsson-fst) and Fisher Exact Tests (FET) in non-overlapping 20 kb windows, containing at least 30 SNPs (Fig. S4A and B). Analyses contrasting Faroese hares with Alpine hares and Fennoscandian hares pooled together were performed using the following parameters: --min-count 4, --min-coverage 10, --max-coverage 51,105 --window-size 20000 --step-size 20000 --min-covered-fraction 0.25 --pool-size 40:78. The maximum coverage was chosen to be 3 times the mean coverage of each concatenated bam. For FET, a Bonferroni-corrected significance threshold was used and set at  $p < 3.7 \times 10^{-7}$ . Analyses contrasting Faroese hares and Alpine hares, and Faroese hares and Fennoscandian hares were done adjusting coverage and significance thresholds and pool sizes (Table S4).

### **Discovery of structural variants**

The Faroese mountain hare genome sequenced at 6.9X was used to inspect the longest candidate region (mapped to chromosome 4) for structural variation, including deletions, insertions, inversions, duplications and translocations. Lumpy (32), which uses read-pair, split-read and read-depth information to detect structural variation, Delly (33), which relies on read-pair and split-read information, and BreakDancer, which uses read-pair information (34), were used with default settings. In addition, candidate structural variants were confirmed through visual inspection of the bam files in IGV (Integrative Genomics Viewer; 35, 36). A candidate insertion-deletion was detected and validated using a three-primer PCR assay, which resulted in distinguishable PCR products: one forward primer anchored close to the insertion-deletion (*LTM\_indel\_F1*), one forward primer within the insertion (*LTM\_indel\_F01*), and a reverse primer immediately after the insertion-deletion (*LTM\_indel\_R*) (Table S5). The sequences of the amplified fragments were confirmed by Sanger sequencing.

### **SNP and insertion-deletion genotyping**

To confirm the genotype-phenotype association within the candidate regions in chromosomes 4 and 15, clarify the segregation patterns of the inferred variants and remove the confounding effect of population structure that could create spurious signals of association in our genome scans, we genotyped 59 SNPs and the inferred insertion-deletion in 97 *L. timidus* individuals from the same sampling localities included in the genome scans: FAR, N = 35; FSC, N = 34; ALP, N = 28 (Table S1, Fig. S5). DNA extraction for the additional samples was performed as previously described. In addition, 29 individuals from Sweden and Russia, deposited in the collection of the Swedish Museum of Natural History, originally sampled during winter and for which the winter color phenotype could be assessed – grey (N = 15), white (N = 14) – were also included in the genotyping assay (Tables S1, S6 and S7). DNA extraction of museum skin samples was performed in dedicated laboratory facilities suitable for manipulation of samples with low content of endogenous DNA, following Dabney et al. (37). All genotyped SNPs were chosen for having allele frequency differences between the Faroese and other populations between 0.75 and 1, according to the PoPoolation2 analysis (snp-frequency-diff.pl), and were located in windows showing extreme PBS. Thirty-six and five SNPs were agglomerated in the regions of *Agouti* and *USP38*, respectively, and the remaining 18 were located in other windows of extreme PBS scattered along the genome. SNPs were genotyped using the MassARRAY technology at the Genome Transcriptome Facility in the University of Bordeaux, France. The insertion-deletion was genotyped using the devised three-primer PCR approach described above with some modifications for the museum samples (indicated in parentheses). PCRs were performed in 6 µl reactions containing 2.1 µl Qiagen Multiplex PCR Master Mix (2.4 µl for museum samples), 0.2 µl primer F1, 0.1 µl primer F2, 0.3 µl primer R, 2.8 µl water (2.4 µl) and 0.5 µl template DNA. The PCR profile was as follows: 95°C - 15 min, 35 cycles of 95°C - 30 s, 62°C - 30 s (60 s) and 72°C - 35 s (40 s), and 72°C - 10 min. For the museum samples showing greater level of DNA degradation, an independent validation of the genotypes was performed using another three-primer PCR approach (primers *LTM\_indel\_F2*, *LTM\_indel\_F3* and *LTM\_indel\_R*; Table S5). A volume of 0.3 µl of each primer was used in these additional PCR reactions. Significance of the associations of SNPs and the insertion-deletion with the winter color phenotype was tested using *SNPassoc* R package (38).

## Gene expression analysis



The expression of *Agouti* hair-cycle isoform (*Agouti-HC*) and reference genes *ACTB* and *SDHA* (Figs. 3 and S7) was quantified in skin biopsies sampled during the autumn molt from winter-grey (FAR; N=3) and winter-white hares (ALP; N=5). Skin was opportunistically sampled from the dorsum of mountain hares killed during regular hunting campaigns, representing three stages of the progressing molt: brown, intermediate and white/grey (nine skin samples from the three Faroese hares, and 15 skin samples from the 5 Alpine hares) (39). Total RNA was extracted from 30 mg of each skin sample with the RNeasy Mini Kit (Qiagen). Tissue was homogenized in a rotor-stator homogenizer (Mixer Mill MM400, Retsch) at 30 Hz for 10 min. The RNA integrity was checked with the Agilent Technologies TapeStation for a minimum RIN > 7 (Table S9). First-strand cDNA synthesis was performed using oligo (dT) primers and the GRS cDNA synthesis kit (GRISP) using 400 ng of RNA from skin sample (except for two samples that had insufficient amount of RNA, resulting in no qPCR product). Relative expression was quantified using quantitative PCR (qPCR) of the gene of interest, normalized across individuals to the reference genes. Primers amplifying the *Agouti* hair cycle isoform (*Agouti-HC*) were designed to anchor in the *Agouti-HC* non-coding exon and the first *Agouti* coding exon. All primers, both for *Agouti* and reference genes, were anchored in regions showing no polymorphisms between winter color morphs. The amplification efficiencies were calculated based on the slope of a regression line fitted to  $C_t$  values of five samples from 2-fold serial dilutions ( $E = 10^{(-1/\text{slope})} - 1$ ), using two replicates per sample (Table S9). Then, three replicate qPCR reactions were performed per skin sample, using 1X iTaq™ universal SYBR® green supermix (Bio-Rad), 0.4  $\mu\text{M}$  each primer and 1  $\mu\text{l}$  cDNA (2-fold dilution of stock cDNA, except for four samples marked with asterisks in Table S9), in a total volume of 10  $\mu\text{l}$ . The qPCR thermal conditions were as follows: 95°C – 30 s polymerase activation and cDNA denaturation, 40 cycles of 95°C – 5 s, 62°C – 30 s, and melting curve analysis from 65°C to 95°C, with 0.5°C increments. The raw qPCR results, presented as the threshold cycle ( $C_t$ ), were used to calculate expression of the *Agouti-HC* isoform, normalized by the expression of the *ACTB* and *SDHA* genes using the formula  $2^{-\Delta C_t}$ , where  $\Delta C_t = C_t^{\text{Agouti}} - C_t^{\text{ref gene}}$ . We performed calculations by subtracting the mean  $C_t$  of the reference gene from each technical replicate  $C_t$  of the *Agouti* gene (Table S9), to present the relative expression as normalized individual data points. Additionally, we performed a Bayesian analysis where raw qPCR data were represented as molecule counts, and described using generalized linear mixed models under a Poisson-lognormal error distribution (40). This method is suitable also for low-abundant targets, as it uses information about no amplification status. Although

reference genes may sharpen estimates of model parameters, they are not strictly required, because normalization is performed within the model. We used the naïve model implemented in *MCMC.qpcr* R package to infer expression levels of all three genes, *Agouti*, *ACTB*, *SDHA* (Fig. S7B).

### Selection analyses

Tajima's D (41) for chromosome 4 (Fig. S8D) was calculated with PoPoolation1 after subsampling the mpileup file to ensure uniform coverage (--target-coverage 10), as recommended in the software's manual. Tajima's D was estimated in 200 kb non-overlapping windows with the following parameters: --min-count 1 --min-coverage 4 --max-coverage 10 --min-qual 20 --min-covered-fraction 0.25 --dissable-corrections.

To identify signals of selective sweeps along chromosome 4, we used Pool-hmm (42), which implements a hidden Markov model to detect signatures of selective sweeps in Pool-Seq data (Figs. 2D, S8 and S9). Based on the pattern of allele frequencies, this method predicts the most likely hidden state at each site from three possible states (neutral, intermediate, selection). The hidden Markov model, takes into account also the correlation of allele frequencies between sites in addition to the site frequency spectrum (SFS), thus being more robust to bottleneck scenarios than composite likelihood ratio approaches (43). We ran Pool-hmm for pooled sequence data per population with the following parameters: -n 40 -c 10 -C 51 -q 30 -e sanger --pred -k 1e-30 --theta 0.0034 (theta estimated with PoPoolation1). To take into account the confounding effect of the strong non-equilibrium situation imposed by the demographic history, the transition probability between hidden states ( $k$ ) was determined based on neutral data simulated according to the inferred demographic model using ABC (Table S4). Simulations were in addition performed retaining the extremes of the 95% high posterior density intervals that maximize the strength of the bottleneck and population growth (lower 95% HPD value for  $N_F$  and  $g$  and larger 95% HPD for  $N_{FAR}$ ; Table S4). We simulated 1,000 replicates of 1 Mb regions using fastsimcoal26 (27), assuming recombination rate 1 cM/Mb ( $1 \times 10^{-8}$  per bp per generation) (44). The conservative  $k=1e-30$  was retained, which resulted in a False Discovery Rate = 0 under the demographic scenario and 0.008 under the extreme bottleneck and growth scenario.

We also looked for signals of selective sweeps along chromosome 4 using the composite likelihood ratio test derived from genotype likelihoods, implemented in SweeD (45) (Figs. S8 and S9). This method detects signals of recent positive selection based on local deviations in the SFS relative to the background SFS.

The input for SweeD was prepared by converting the ANGSD allele frequencies output (mafs file) into the SweepFinder format, using a custom R script (available at <https://github.com/evochange/far>). The European rabbit allele (ancestral state) was used to determine the major allele (-doMajorMinor 5). We ran SweeD in ~20 kb windows (-grid 4570) using polymorphic sites and fixed derived sites. The significance P-value threshold for CLR was defined based on the CLR distribution from data simulated according to the demographic model inferred using ABC, using the parameters described above. We simulated 1,000 windows of 10 Mb, assuming recombination rate 1 cM/Mb (44), using *msms* (46) and used  $P < 0.01$  as the CLR significance threshold.

Finally, we estimated the probability of fixation of a rare allele ( $1/2N_e$ ) after ~65 years of evolution under drift alone with three sets of parameters using the forward simulations implemented in SLiM3 (47). The probability of fixation at 33 and 65 generations (considering putative generation times of two and one year, respectively) was determined using 10,000 replicates of the drift process under non-equilibrium scenarios (Table S10). The three tested scenarios used 1) the modes of ABC parameter estimates for size of initial population and growth rate; 2) the low 95% HPD interval of ABC parameter estimates for size of initial population and growth rate (implying the strongest bottleneck and population growth); and 3) the historical record of four founder individuals and the growth rate needed to achieve the low 95% HPD interval value of the ABC inference for current effective population size of the Faroese hare (20,000 diploid individuals) (Table S10). Negative growth backward-in-time inferred from the ABC analysis was converted into positive growth for the forward-in-time simulations. The probability of fixation was determined by the proportion of simulations where fixation was achieved at each time point.

### **Topology weighting**

To understand the evolutionary origin of the variants associated with winter coloration in mountain hares, we first performed a topology weighting analysis along chromosome 4, as implemented in Twisst (48), using whole-genome sequencing data from *Lepus* species obtained at higher coverage (6.1 - 29.3X; Table S3). We used *genomics\_general* scripts available at [https://github.com/simonhmartin/genomics\\_general](https://github.com/simonhmartin/genomics_general) to convert the vcf file to “geno” format (script: *parseVCF.py*), and then to calculate neighbor-joining trees in windows of 50 SNPs (script: *phyml\_sliding\_windows.py*). Topology weighting was performed considering three different sets of species/populations: 1) one winter-grey Faroese mountain hare (*L. timidus*; FAR), two winter-white

mountain hares, from the Alps and Fennoscandia (MTH), two Iberian hares (IBH), and two European brown hares - one from the Iberian Peninsula (EBH\_IB) and one from central Europe (EBH\_CE) (Fig. S10A); 2) one winter-grey Faroese mountain hare (FAR), two winter-white mountain hares, one from the Alps and one from Fennoscandia (MTH), two Iberian hares (IBH), one winter-white snowshoe hare (SSH\_WW), and one black-tailed jackrabbit (BTJ) (Fig. S10B); 3) one winter-grey Faroese mountain hare (FAR), two winter-white mountain hares, one from the Alps and one from Fennoscandia (MTH), two Iberian hares (IBH) and one black-tailed jackrabbit (BTJ) (Fig. 4A).

### ***f<sub>d</sub>* statistic and *d<sub>XY</sub>***

To explore the close relationship between Faroese mountain hare and the Iberian hares at the *Agouti* region, the fraction of introgression (*f<sub>d</sub>* statistic) (49) was estimated in 20 kb overlapping windows (step size 2 kb) along chromosome 4, with at least 100 genotyped SNPs per window (Fig. 4B). We used *genomics\_general* scripts available at [https://github.com/simonhmartin/genomics\\_general](https://github.com/simonhmartin/genomics_general), and the following phylogenetic conformation: *P1* = *FSC*, *P2* = *FAR*, *P3* = *IBH*, *O* = *RAB*. *Genomics\_general* scripts were also used to calculate the absolute genetic distance (*d<sub>XY</sub>*) between Faroese *L. timidus* and *L. granatensis*, in 20 kb overlapping windows (step size 2 kb) along chromosome 4, with at least 25% sites covered per window. From *d<sub>XY</sub>*, the Relative Node Depth (RND; 50) was calculated by dividing *d<sub>XY</sub>* by the distance to the European rabbit (*RAB*). This statistic corrects the estimated *d<sub>XY</sub>* using the distance to an outgroup to control for local variation in mutation rate. The *f<sub>d</sub>* statistic was also calculated using the European brown hare (*L. europaeus*) instead of the Iberian hare (*L. granatensis*) as *P3* (Fig. S11).

### **RAxML local phylogeny**

An alignment of six *Lepus* species (Table S3) was generated for the genomic region showing a sharp increase in *fd* values (4:5,400,000-5,760,000) (Fig. 4B) and used to construct a local maximum-likelihood phylogeny using RAxML (51) (Fig. 4F). A phylogeny for the whole chromosome 4 was also built using the same specimens (Fig. 4E). RAxML was run with the following settings: -m GTRGAMMA -f a -x 2408 -N 100 -p 2330 and the sequence from the European rabbit reference genome was used as the outgroup.

## Simulations of $d_{XY}$

To further test whether the low  $d_{XY}$  between the winter-grey mountain hares and the Iberian hares resulted from introgression or was instead compatible with an incomplete lineage sorting scenario, we performed coalescent simulations of species divergence. Species divergence history parameters, including effective population sizes of current and ancestral populations, time of divergence and migration rates, were estimated with G-PhoCS (52), based on high coverage data from two mountain hare individuals (Alpine and Fennoscandian; Table S3) (from 3) and two Iberian hare individuals (Table S3) (from 3). Fragments of 1 kb distancing at least 50 kb were selected from intergenic regions (at least 1 kb from the nearest gene). Repeats, identified in the rabbit reference genome with RepeatMasker and downloaded as a bed file from UCSC Genome Browser (<https://genome-euro.ucsc.edu>), were masked in the selected 1 kb fragments. Finally, fragments with > 40% missing data were excluded. This resulted in a dataset of 11,480 independent 1 kb loci. Model parameters were inferred assuming possible bidirectional migration. The model was run three times and the convergence of the combined run was checked with Tracer v1.7 (53) by examining the effective sample size (ESS) of each parameter. For all runs, 100,000 generations were discarded as burn-in, and 1,000,000 MCMC iterations were run, sampling every 10 iterations. To convert scaled parameter estimates, we used a mutation rate ( $\mu$ ) of  $2.8 \times 10^{-9}$  substitutions/site/generation (3), considering a divergence of 11.8 million years divergence between rabbits and hares (7) and a presumable generation length of two years (21).

The parameter values from the inferred model (Table S11) were then used in *msms* (46) to simulate 1,000 fragments of 20 kb, and test if the variance of the coalescent and lineage sorting process could retain closely related variants in the species, as seen in the empirical data. Given that the estimated local mutation rate of the *Agouti* region (using  $\mu = d_{XY} / (2T_D + 4N_e)$  (54), where  $d_{XY}$  is the sequence distance between *L. timidus* and the rabbit averaged along the region,  $T_D$  is the time of divergence between hares and rabbits of 11.8 million years (7), and  $N_e$  is the ancestral effective population size ( $N_e = 1,000,000$  assumed)) is larger than the genome-wide estimate ( $3.2 \times 10^{-9}$  vs  $2.8 \times 10^{-9}$  substitutions/site/generation) we opted to perform the simulations using the latter, to increase the conservative nature of the test.

Simulations were done under four demographic models: i) the full demographic model, to assess the reliability of the demographic inference to replicate genome-wide empirical data; ii) inferred demographic model but without inter-species migration, to assess  $d_{XY}$  expectations under a strict lineage sorting model; iii)

model with strong selection in the ancestral population, leading to fixation of one variant before the split and reducing  $d_{XY}$  to a minimum, and no migration, and iv) model with selection prior to the split and with bidirectional migration. The *msms* commands were as follows:

i) full demographic model:

```
msms 4 1000 -t 70.8 -I 2 2 2 0 -m 1 2 0.190 -m 2 1 0.010 -n 1 0.57 -n 2 0.96 -en 0.74 2 1 -ej 0.74 1 2,
```

where  $t = 4 \times 316277 \times 2.8 \times 10^{-9} \times 20000$ ;

ii) demographic model without migration:

```
msms 4 1000 -t 70.8 -I 2 2 2 -n 1 0.57 -n 2 0.96 -en 0.74 2 1 -ej 0.74 1 2;
```

iii) selection in ancestral population, model without migration:

```
msms 4 1000 -t 70.8 -I 2 2 2 0 -n 1 0.57 -n 2 0.96 -en 0.74 2 1 -ej 0.74 1 2 -N 316277 -SFC -SI 0.755 2 0
0.0000016 -Sc 0.74 2 63255 0 0 -Sp 0.5;
```

where selection coefficient  $s = 0.1$ , selection starts 25,000 generations ago before population split, and an initial frequency of the beneficial allele of  $1/2N_e$ . By using -SFC flag we kept only simulations where the beneficial allele was not lost, therefore leading to its fixation.

iv) selection in ancestral population, model with migration:

```
msms 4 1000 -t 70.8 -I 2 2 2 0 -m 1 2 0.190 -m 2 1 0.010 -n 1 0.57 -n 2 0.96 -en 0.74 2 1 -ej 0.74 1 2 -N 316277
-SFC -SI 0.755 2 0 0.0000016 -Sc 0.74 2 63255 0 0 -Sp 0.5;
```

The empirical distribution of  $d_{XY}$  along the *Agouti* association region was generated by sampling with replacement 20,000 sites from the region 1,000 times, and calculating  $d_{XY}$  for each replicate (Fig. 4D and S12A). This analysis was replicated for the divergence between the mountain hare (using the same whole-genome sequence data; Table S3) and the European brown hare (using one genome from the Iberian Peninsula and another from central Europe; Table S3). In this case, the parameters of the demographic model of divergence were inferred from 5,705 independent 1 kb loci.  $d_{XY}$  simulations were conducted as described above (Fig. S12B and C).

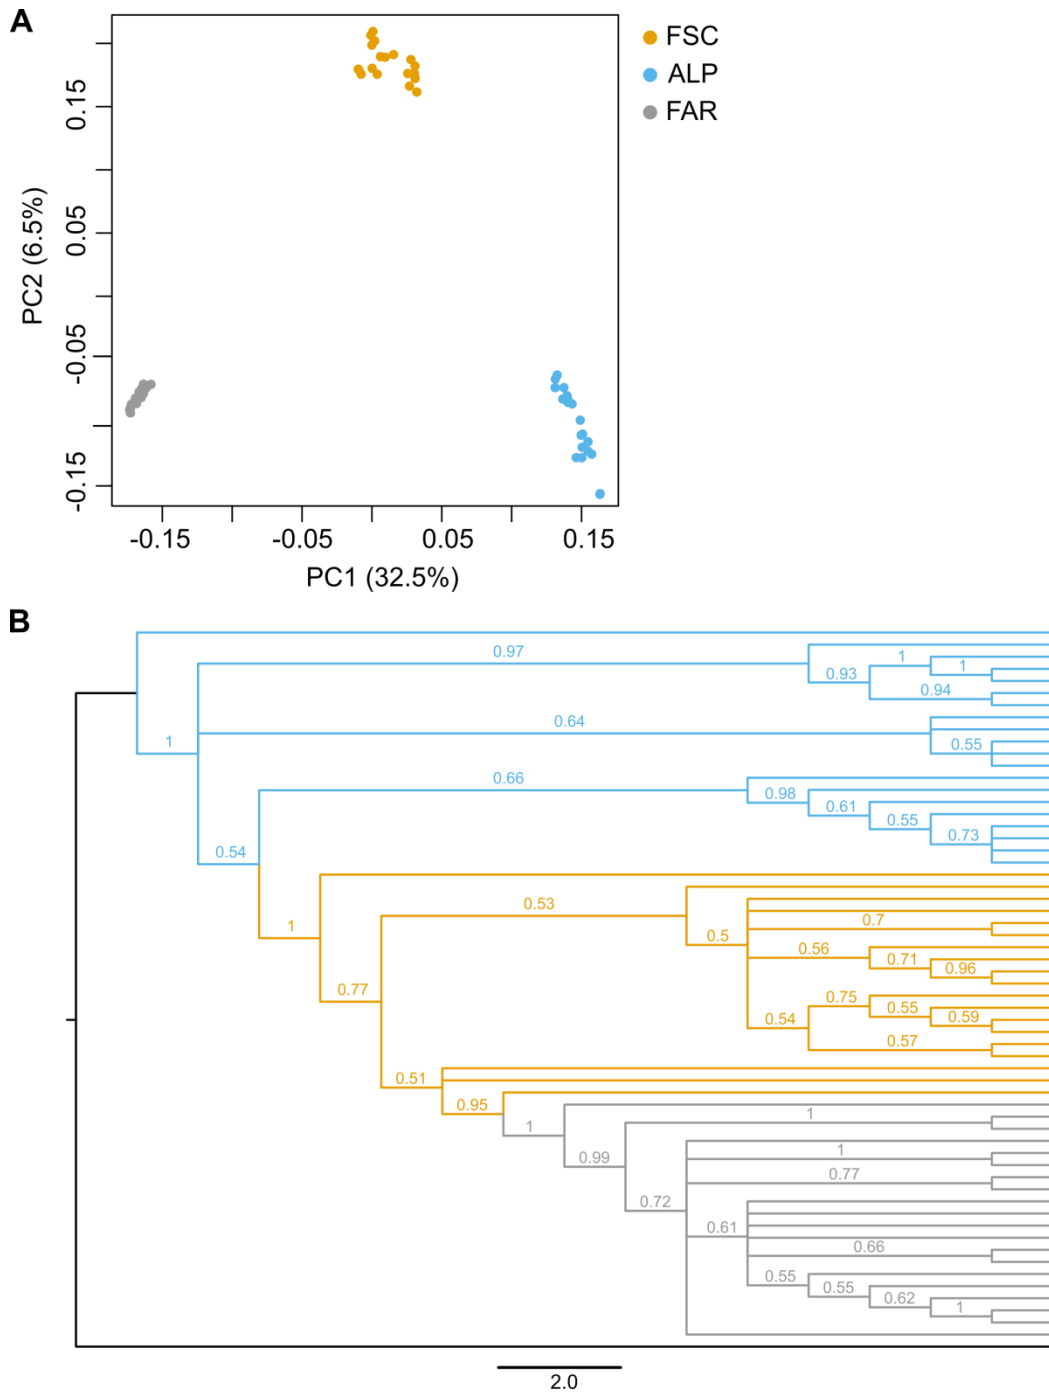

**Fig. S1.** Population structure and evolutionary relationships among mountain hare populations: grey - the Faroe Islands (FAR), blue - the Alps (ALP), orange - Fennoscandia (FSC). **(A)** Principal component analysis based on 123,995 polymorphic sites sampled every 20 kb to reduce non-independence. The proportion of variance of the first two principal components is shown. **(B)** A neighbor-joining tree based on individual pairwise distances, constructed with 127,413 polymorphic sites and node support derived from 100 bootstrap replicates; the black line depicts the outgroup, the snowshoe hare (*Lepus americanus*).

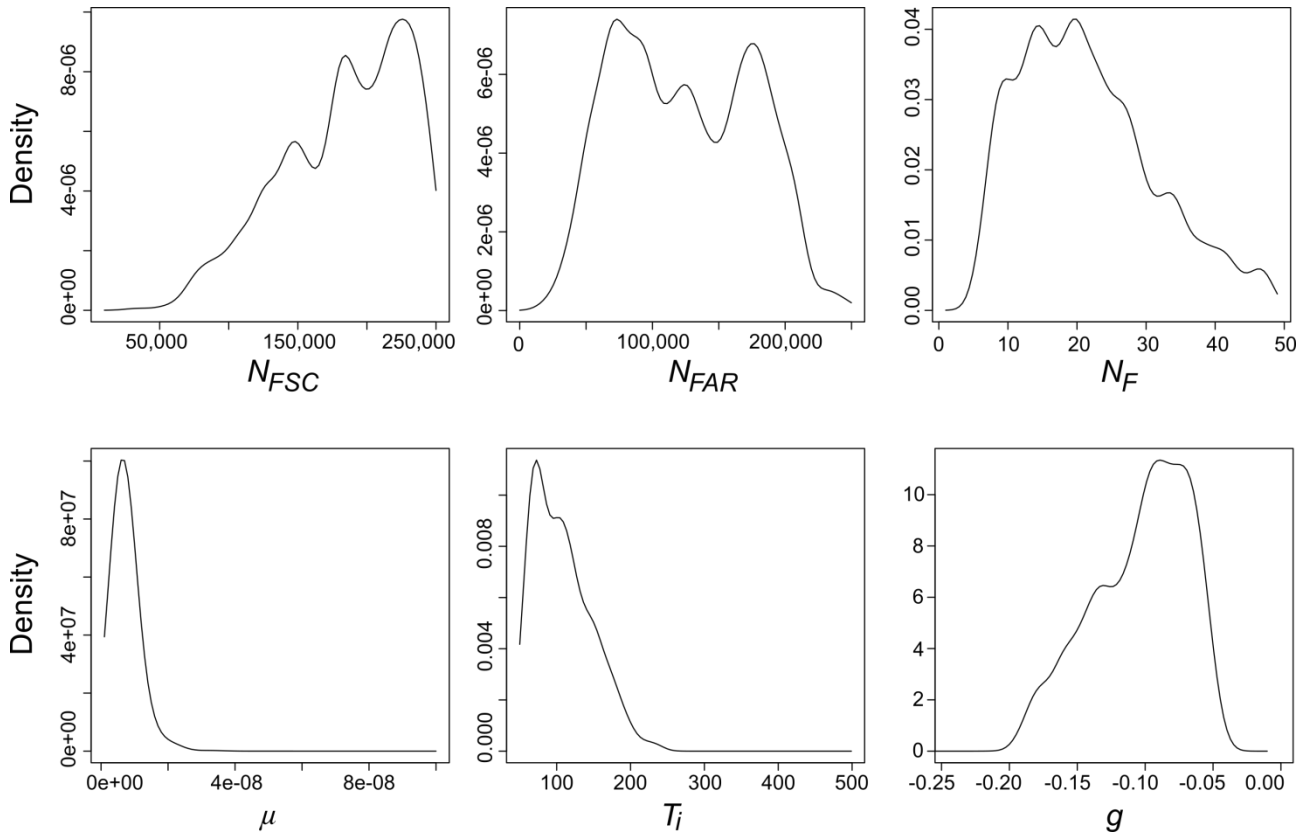

**Fig. S2.** Distribution of posterior probabilities of the demographic parameters inferred with ABC.  $N_{FSC}$  – effective population size (haploid numbers) of Fennoscandian population,  $N_{FAR}$  – effective population size (haploid numbers) of Faroese population,  $N_F$  – effective population size (haploid numbers) of the Faroese hare founder population,  $T_i$  – time of the introduction in generations,  $g$  – growth rate (negative value backward in time implies expansion forward in time; calculated according to the equation  $N_F = N_{FAR} e^{gT_i}$ ),  $\mu$  – mutation rate in units of mutations per site per generation.



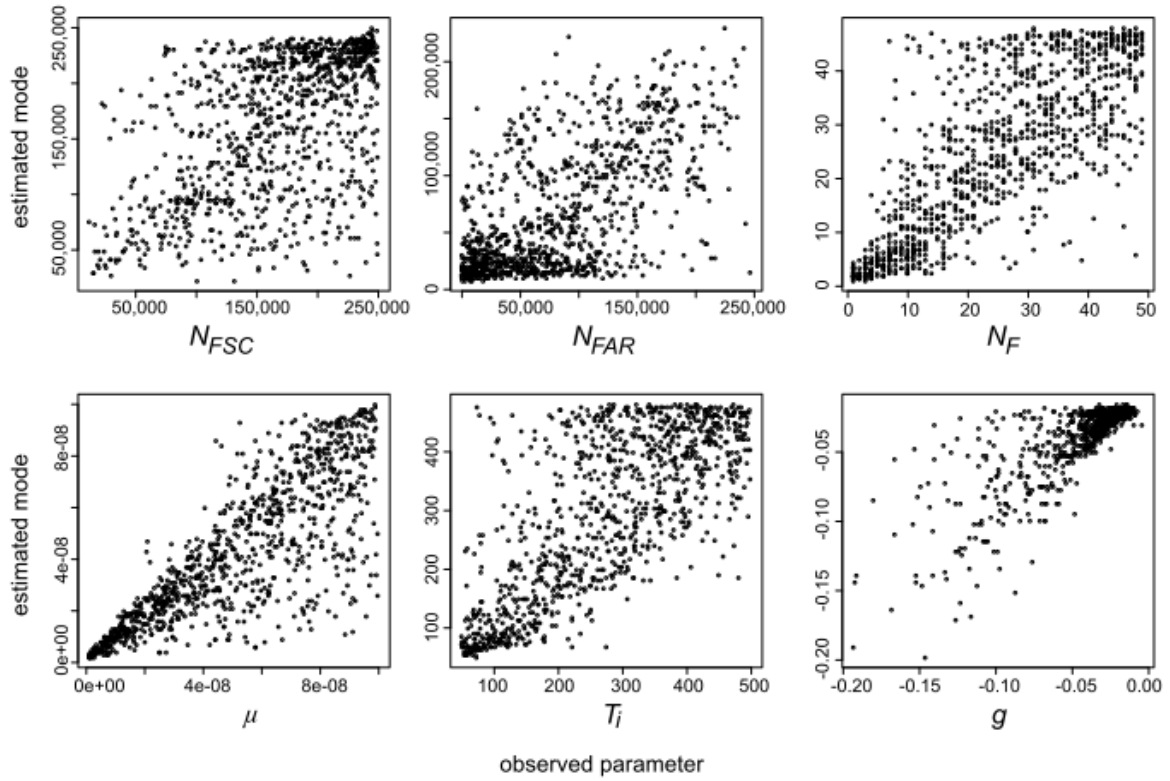

**Fig. S3.** Validation of parameter estimates with ABC for the model investigated, based on 1,000 parameter values picked from the prior distribution (randomValidation in ABCtoolbox).  $N_{FSC}$  – effective population size (haploid numbers) of Fennoscandian population,  $N_{FAR}$  – effective population size (haploid numbers) of Faroese population,  $N_F$  – effective population size (haploid numbers) of the Faroese hare founder population,  $T_i$  – time of the introduction in generations,  $g$  – growth rate (negative value backward in time implies expansion forward in time; calculated according to the equation  $N_F = N_{FAR} e^{gT_i}$ ),  $\mu$  – mutation rate in units of mutations per site per generation.

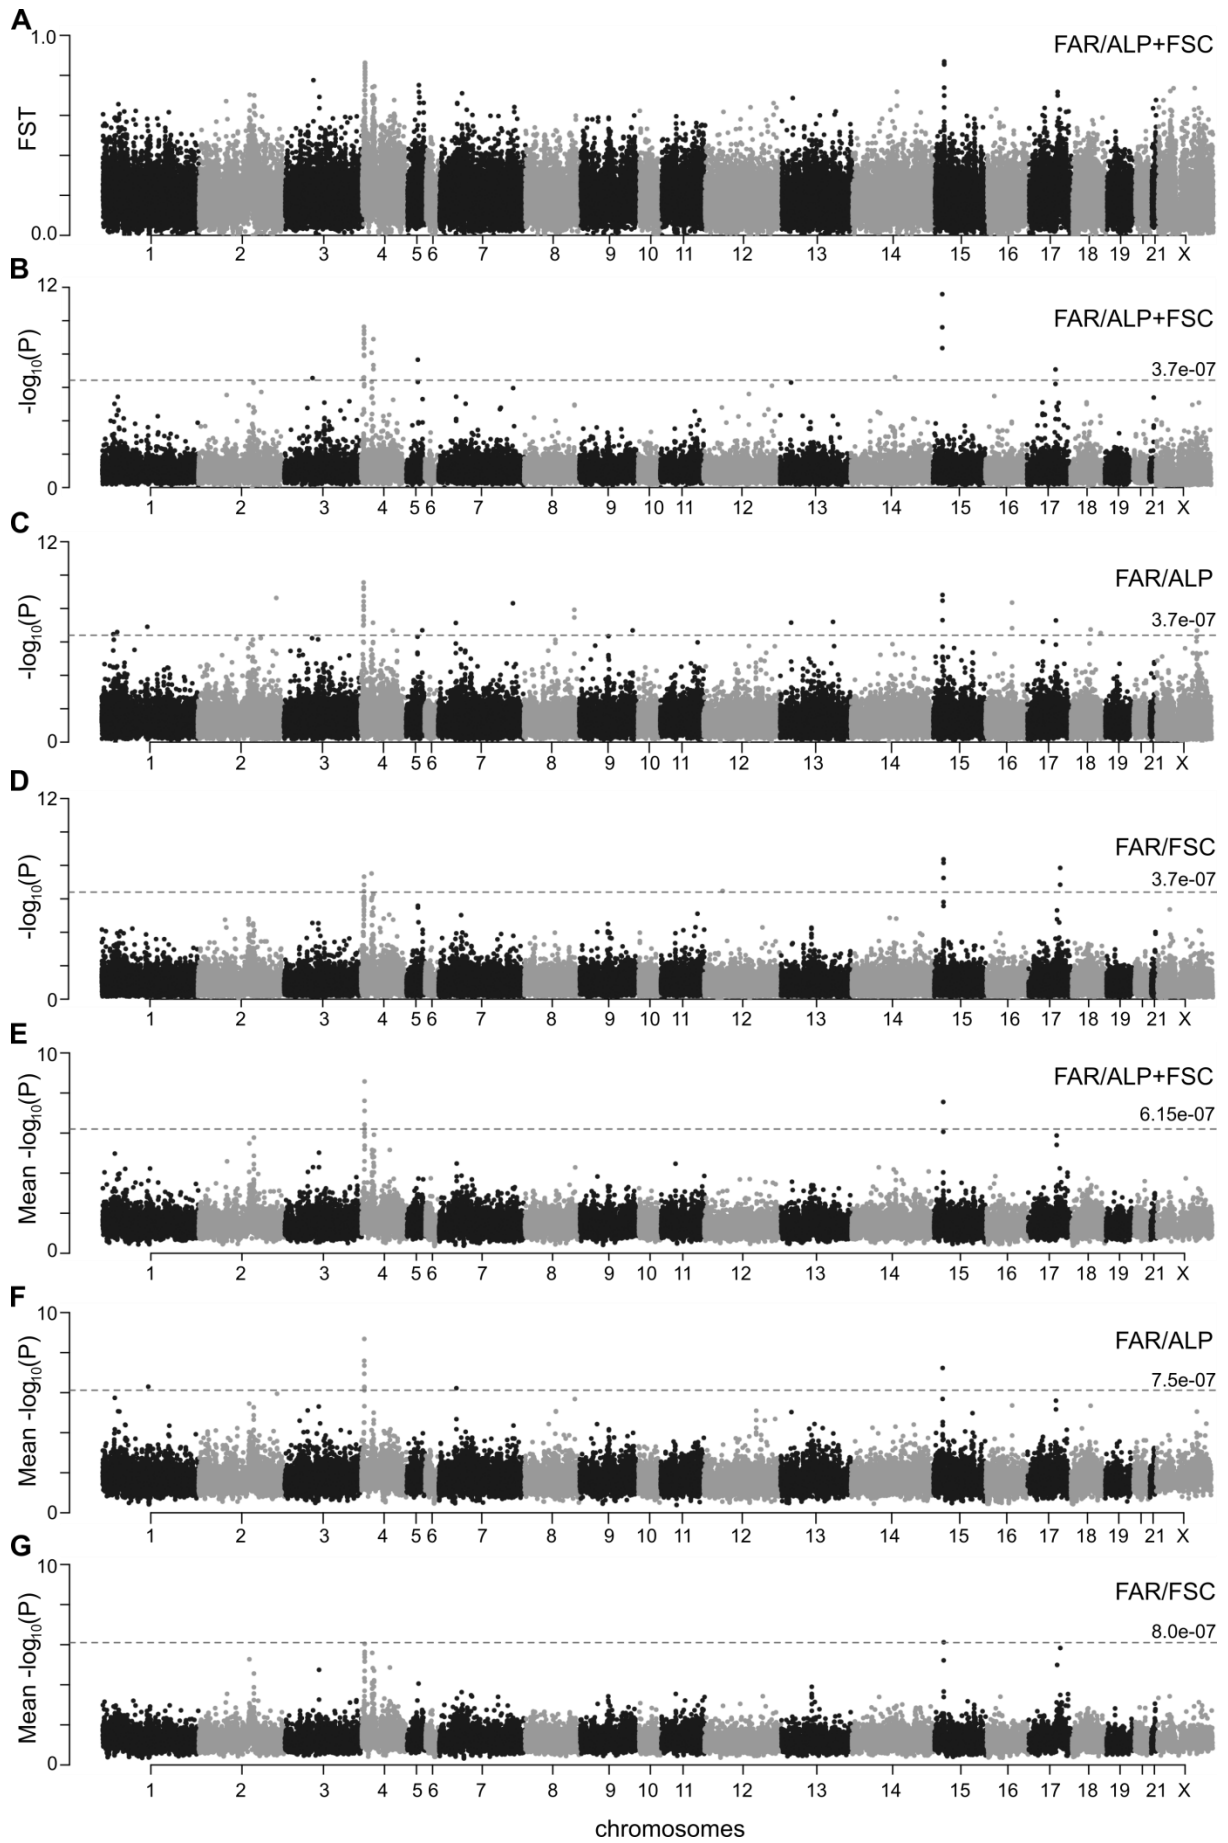

**Fig. S4.** Manhattan plots of differentiation scans and case-control association tests. **(A)**  $F_{ST}$  of Faroese hares (FAR) vs. pooled Alpine and Fennoscandian populations (ALP + FSC) estimated with PoPoolation2, based on 14,102,734 SNPs.  $F_{ST}$  values are plotted against the position of 20 kb non-overlapping windows on each chromosome. **(B)** Fisher exact test of allele frequency differences between Faroese hares (FAR) and pooled Alpine and Fennoscandian populations (ALP + FSC) estimated with PoPoolation2, based on 14,102,734 SNPs. The  $-\log_{10}(P)$  values are plotted against the position of 20 kb non-overlapping windows on each chromosome. **(C)** Fisher exact test of allele frequency differences between Faroese hares (FAR) and Alpine hares (ALP). **(D)** Fisher exact test of allele frequency differences between Faroese hares (FAR) and Fennoscandian hares (FSC). **(E)** Manhattan plot of case-control association tests statistics for Faroese hares (FAR; cases) vs. Alpine and Fannoscandian hares (ALP + FSC; controls), inferred from genotype likelihoods, plotted as mean  $-\log_{10}(P)$  values per windows of 100 SNPs. **(F)** Manhattan plot of case-control association tests statistics for Faroese hares (FAR; cases) vs. Alpine hares (ALP; controls). **(G)** Manhattan plot of case-control association tests statistics for Faroese hares (FAR; cases) vs. Fennoscandian hares (FSC; controls). The dashed lines represent the significance thresholds corrected for multiple tests, calculated from the data.

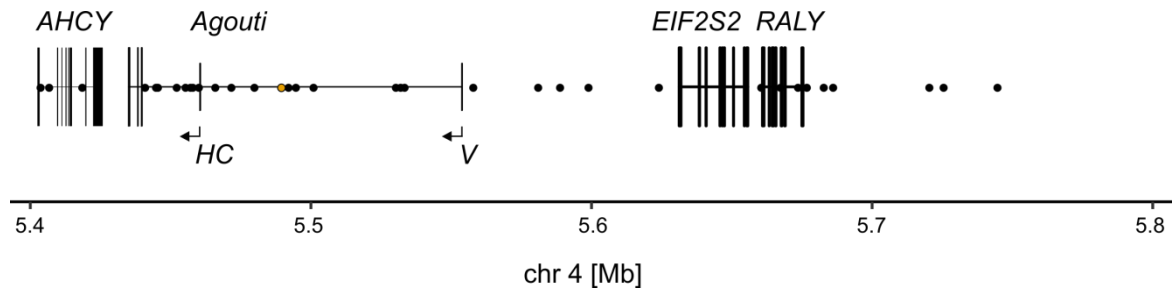

**Fig. S5.** Distribution of 36 genotyped SNPs (black dots) and one insertion-deletion (orange dot) along the association region in chromosome 4, including the structure of four genes: *AHCY*, *Agouti* (*HC* – non-coding exon of the hair-cycle isoform, *V* – non-coding exon of the ventral isoform), *EIF2S2* and *RALY*.

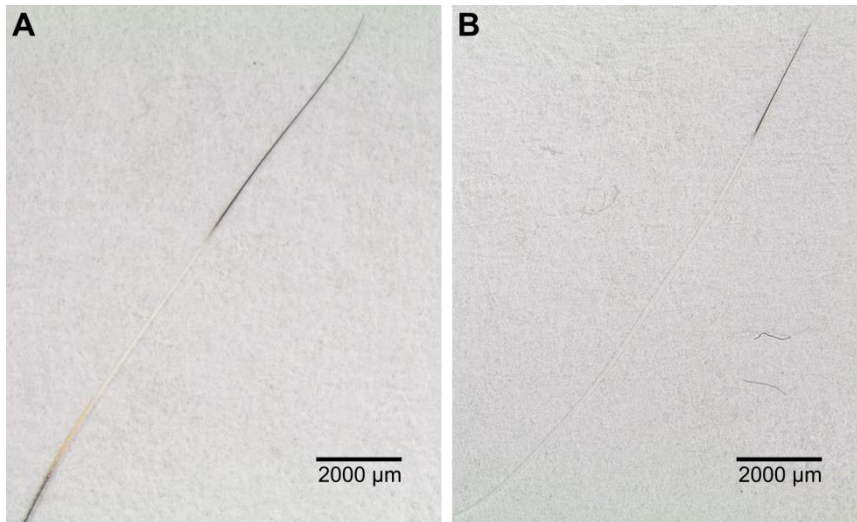

**Fig. S6.** Two common types of hairs present in Faroese mountain hares. **(A)** Black hair with white band. **(B)** White hair with black tip.

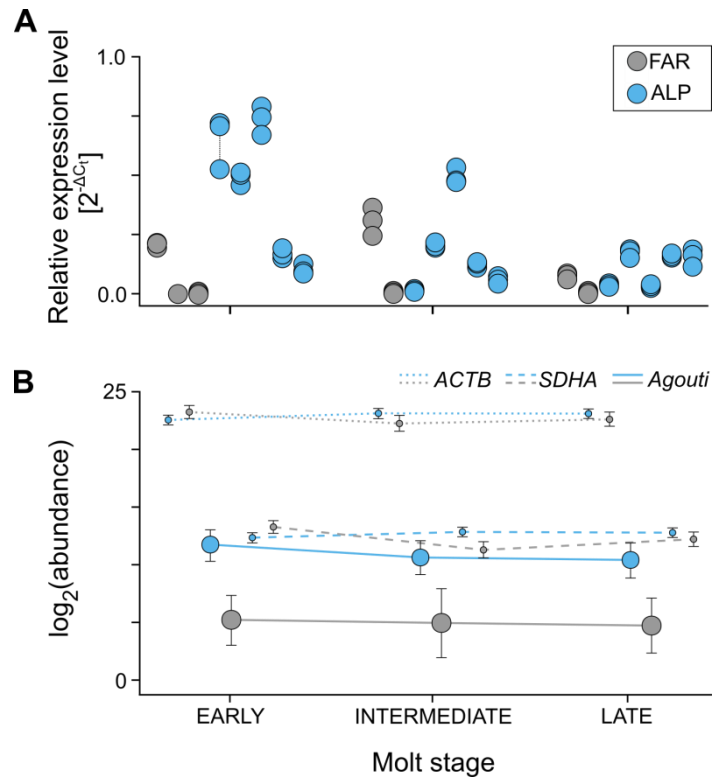

**Fig. S7.** Expression of the *Agouti* hair-cycle isoform in mountain hares during the autumn molt. Skin tissue samples were collected from the dorsum, representing the brown, intermediate, and white/grey stages of the molt. **(A)** The expression level ( $2^{-\Delta C_t}$ ) is shown as relative to the reference gene *SDHA* (see Fig. 3 for the analysis using *ACTB* as reference gene). Each point represents one relative measure and dashed lines connect technical replicates. **(B)** The expression level ( $\log_2(\text{abundance})$ ) estimated using the naïve model of *MCMC.qpcr* R package. The points are posterior means and the whiskers denote 95% credible intervals. See Table S10 for sequences of primers and raw  $C_t$  values.

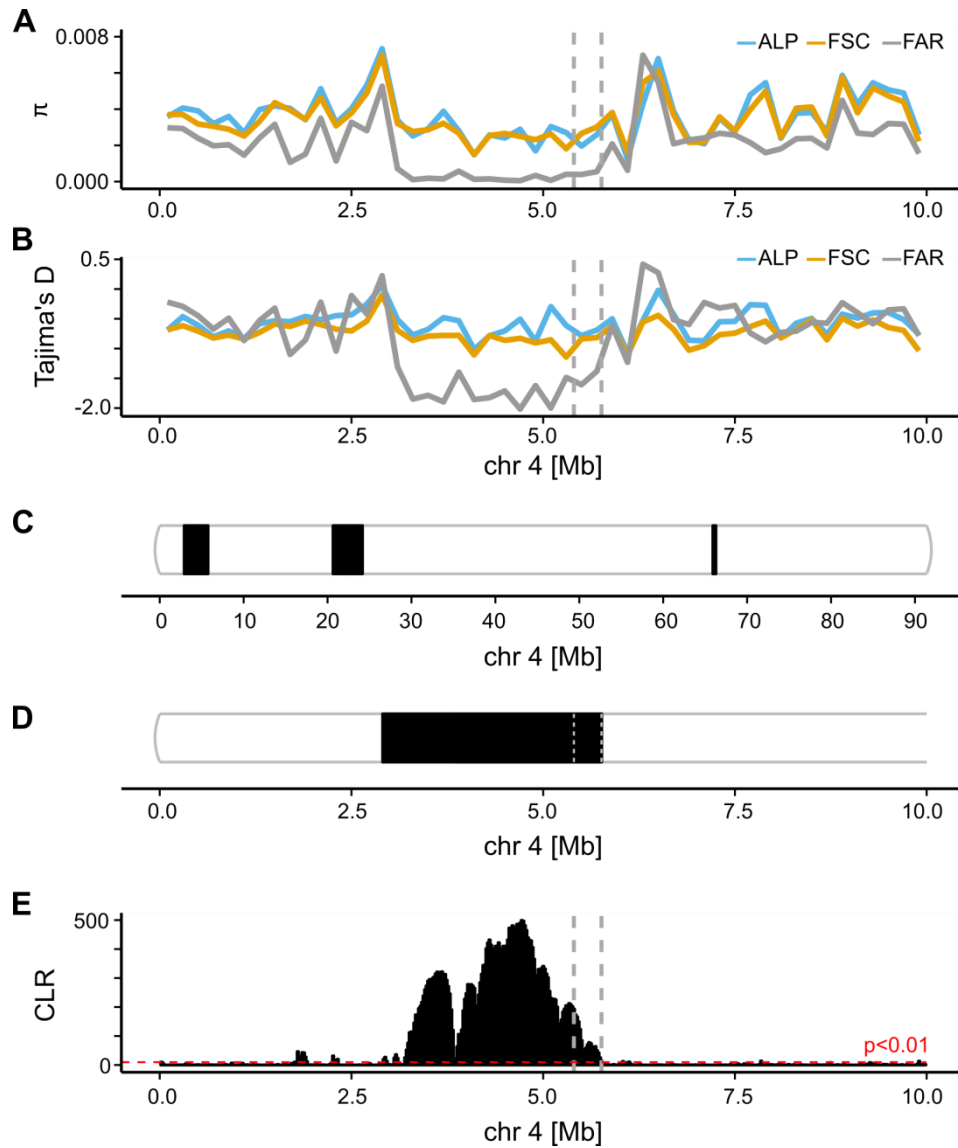

**Fig. S8.** Signatures of selective sweeps in Faroese mountain hares. **(A)** Nucleotide diversity ( $\pi$ ) along the first 10 Mb of chromosome 4. **(B)** Tajima's D along the first 10 Mb of chromosome 4. **(C)** Selective sweeps detected by Pool-hmm along the whole chromosome 4. **(D)** Selective sweep detected by Pool-hmm along the first 10 Mb of chromosome 4 **(E)** SweeD Composite Likelihood Ratio (CLR) along the first 10 Mb of chromosome 4. The red line represents the CLR threshold based on demographic simulations ( $p < 0.01$ ). Vertical dashed grey lines delimit the association region: 4:5,400,000-5,760,000 bp in A, B, E.

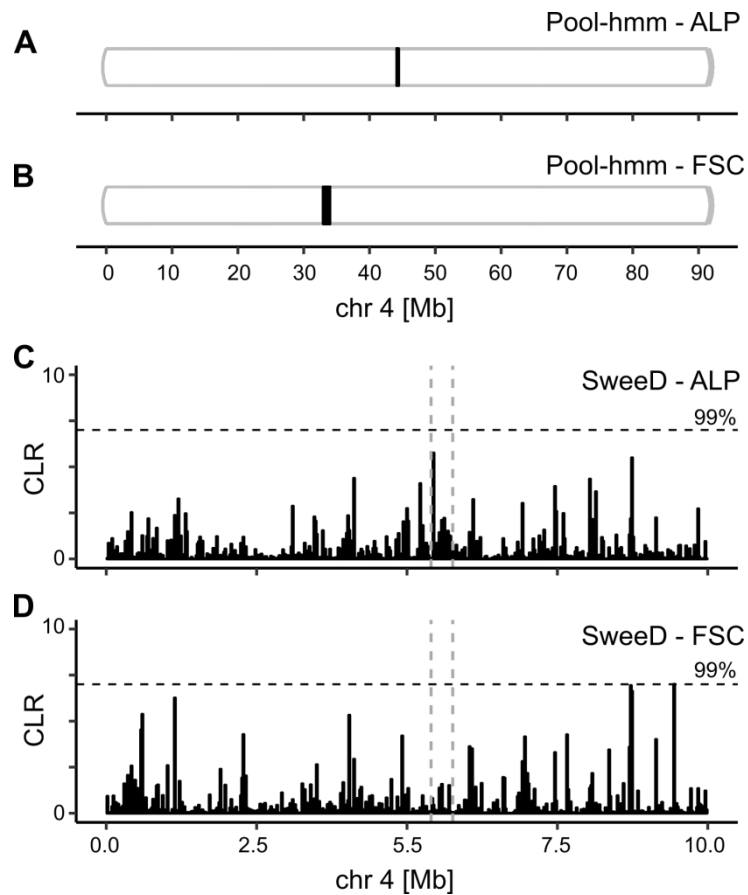

**Fig. S9.** Selection scans at the *Agouti* association region in Alpine and Fennoscandian populations of the mountain hare. **(A)** Selective sweeps detected in chromosome 4 of Alpine hares using Pool-hmm. **(B)** Selective sweep detected in chromosome 4 of Fennoscandian hares using Pool-hmm. **(C)** SweeD Composite Likelihood Ratio (CLR) in the first 10 Mb of chromosome 4 in the Alpine hares. **(D)** SweeD CLR in the first 10 Mb of chromosome 4 in the Fennoscandian hares. Grey vertical dashed lines represent the *Agouti* association region. The horizontal dashed line represents the 99% CLR cutoff (chromosome 4 empirical distribution).



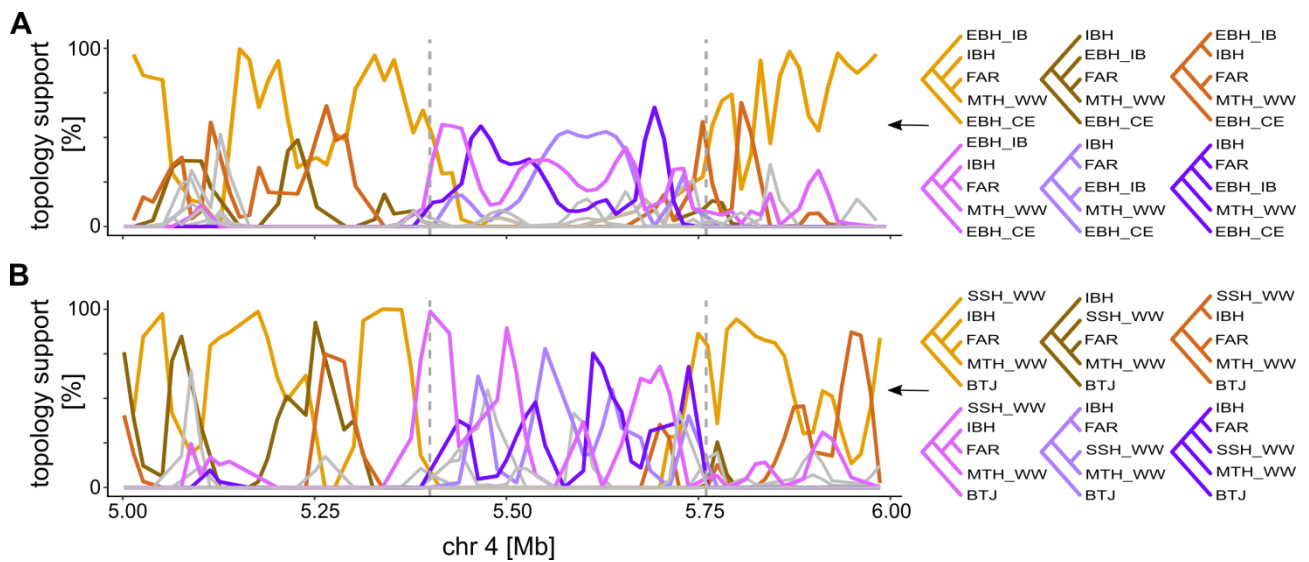

**Fig. S10.** Twisst topology weightings along the *Agouti* association region in chromosome 4 (delimited by dashed lines). All topologies include winter-grey (FAR) and winter-white (MTH\_WW) mountain hares (*Lepus timidus*) and the Iberian hares (IBH; *L. granatensis*). Topology support is plotted with loess smoothing (span = 0.075). Only the most common topologies are shown in detail (the remaining ones are represented in grey). **(A)** Analyses include two European brown hares (*L. europaeus*), from the Iberian Peninsula (EBH\_IB) and central Europe (EBH\_CE). **(B)** Analyses include the black-tailed jackrabbit (BTJ; *L. californicus*) and a winter-white snowshoe hare (SSH\_WW; *L. americanus*).

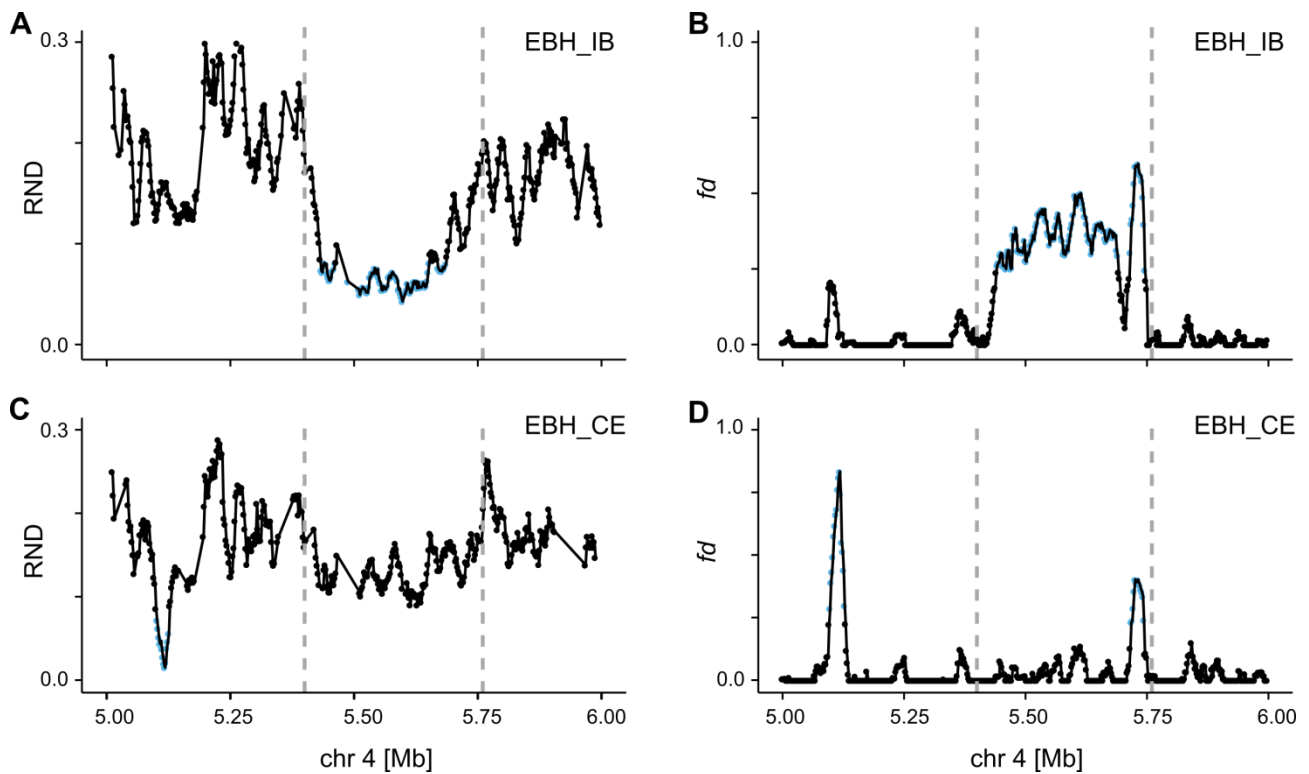

**Fig. S11.** Signatures of variant sharing between Faroese mountain hare (*Lepus timidus*) and the European brown hare (*L. europaeus*) from the Iberian Peninsula (EBH\_IB) and central Europe (EBH\_CE). **(A)** Relative node depth (RND) between the Faroese mountain hare and the European brown hare from the Iberian Peninsula (EBH\_IB). **(B)** Fraction of introgression ( $f_d$  statistic) estimated with the following phylogenetic conformation:  $P1 = FSC$ ,  $P2 = FAR$ ,  $P3 = EBH\_IB$ ,  $O = RAB$ . **(C)** RND between the Faroese mountain hare and the brown hare from central Europe (EBH\_CE). **(D)**  $f_d$  statistic estimated with the following phylogenetic conformation:  $P1 = FSC$ ,  $P2 = FAR$ ,  $P3 = EBH\_CE$ ,  $O = RAB$ . In all plots, blue dots represent 1% lowest (RND) or highest ( $f_d$ ) values along the chromosome 4 empirical distribution. FSC - Fennoscandian mountain hare; RAB - European rabbit.

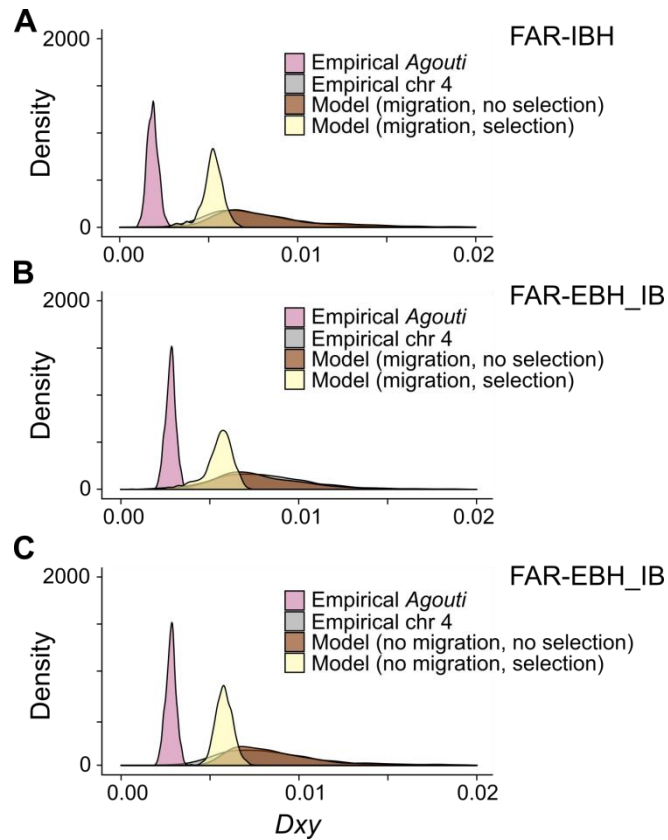

**Fig. S12.** Distributions of  $d_{XY}$ . **(A)**  $d_{XY}$  between the Faroese mountain hare (*Lepus timidus*) and the Iberian hare (*L. granatensis*; IBH); simulated data derived from a model assuming bidirectional migration. **(B)**  $d_{XY}$  between the Faroese mountain hare (*L. timidus*) and the European brown hare (*L. europaeus*) from the Iberian Peninsula (EBH\_IB); simulated data derived from a model assuming bidirectional migration. with simulations including migration. **(C)**  $d_{XY}$  between the Faroese mountain hare (*L. timidus*) and the European brown hare (*L. europaeus*) from the Iberian Peninsula (EBH\_IB); simulated data derived from a model assuming no migration.

**Table S1.** Mountain hare specimens used in this study: samples' code, populations of origin (FAR - the Faroe Islands, FSC - Fennoscandia, RUS - Russia, ALP - the Alps), localities, and data collected (WGS – low individual coverage whole-genome sequencing; SNP Genotyping; qPCR – quantitative PCR). Specimens from the Swedish Museum of Natural History are indicated as MG – museum winter-grey and MW – museum winter-white in the “Population” column. NCBI Sequence read archive (SRA) BioSample accession numbers for the sequence data are indicated.

| Sample code | Population | Locality                                | WGS (SRA BioSample) | SNP Genotyping | qPCR |
|-------------|------------|-----------------------------------------|---------------------|----------------|------|
| LTM.3655    | FAR        | Kollafjørður - Sjóvarhagi, Niðaripartur | SAMN12710257        | X              | -    |
| LTM.3656    | FAR        | Kollafjørður - Sjóvarhagi, Niðaripartur | SAMN12710258        | X              | -    |
| LTM.3658    | FAR        | Kollafjørður - Sjóvarhagi, Niðaripartur | -                   | X              | -    |
| LTM.3659    | FAR        | Kaldbak - Áarhagi, Heimafyri            | -                   | X              | -    |
| LTM.3661    | FAR        | Kaldbak - Áarhagi, Heimafyri            | SAMN12710259        | X              | -    |
| LTM.3663    | FAR        | Kaldbak - Áarhagi, Heimafyri            | -                   | X              | -    |
| LTM.3664    | FAR        | Kaldbak - Býggjarhagi, Yngstugimbrar    | SAMN12710260        | X              | -    |
| LTM.3667    | FAR        | Kaldbak - Býggjarhagi, Yngstugimbrar    | SAMN12710261        | X              | -    |
| LTM.3668    | FAR        | Kaldbak - Býggjarhagi, Yngstugimbrar    | -                   | X              | -    |
| LTM.3670    | FAR        | Velbastað - Lambahagi                   | SAMN12710262        | X              | -    |
| LTM.3672    | FAR        | Velbastað - Lambahagi                   | -                   | X              | -    |
| LTM.3673    | FAR        | Velbastað - Lambahagi                   | SAMN12710263        | X              | -    |
| LTM.3674    | FAR        | Velbastað - Lambahagi                   | -                   | X              | -    |
| LTM.3675    | FAR        | Nólsoy - Borðan                         | SAMN12710264        | X              | -    |
| LTM.3677    | FAR        | Nólsoy - Borðan                         | SAMN12710265        | X              | -    |
| LTM.3678    | FAR        | Nólsoy - Borðan                         | -                   | X              | -    |
| LTM.3680    | FAR        | Nólsoy - Heimarahelvt                   | -                   | X              | -    |
| LTM.3682    | FAR        | Nólsoy - Heimarahelvt                   | SAMN12710266        | X              | -    |
| LTM.3683    | FAR        | Nólsoy - Heimarahelvt                   | SAMN12710267        | X              | -    |
| LTM.3688    | FAR        | Hestur - Øll oyggin                     | SAMN12710268        | X              | -    |
| LTM.3691    | FAR        | Hestur - Øll oyggin                     | -                   | X              | -    |
| LTM.3692    | FAR        | Hestur – Øll oyggin                     | SAMN12710269        | X              | -    |
| LTM.3695    | FAR        | Vestmanna - Dalar, Eystanfyrri          | SAMN12710270        | X              | -    |
| LTM.3696    | FAR        | Vestmanna - Dalar, Eystanfyrri          | SAMN12710271        | X              | -    |
| LTM.3697    | FAR        | Vestmanna - Dalar, Eystanfyrri          | -                   | X              | -    |
| LTM.3698    | FAR        | Vestmanna - Dalar, Eystanfyrri          | -                   | X              | -    |
| LTM.3699    | FAR        | Saksun - Svartá, Fyri Uttan             | -                   | X              | -    |
| LTM.3702    | FAR        | Saksun - Svartá, Fyri Uttan             | SAMN12710272        | X              | -    |
| LTM.3703    | FAR        | Saksun - Svartá, Fyri Uttan             | -                   | X              | -    |
| LTM.3707    | FAR        | Saksun - Svartá, Fyri Uttan             | SAMN12710273        | X              | -    |
| LTM.3978    | FAR        | Kollafjørður - Signabøshagi             | SAMN12710256        | X              | X    |
| LTM.3979    | FAR        | Kvívík - Fjallið                        | -                   | X              | X    |
| LTM.3980    | FAR        | Kvívík - Fjallið                        | SAMN12710274        | X              | -    |
| LTM.3981    | FAR        | Kvívík - Fjallið                        | -                   | X              | X    |
| LTM.3982    | FAR        | Kvívík - Fjallið                        | SAMN12710275        | X              | -    |
| NRM588802   | FSC/MG     | Skåne, Sweden                           | -                   | X              | -    |
| NRM588803   | FSC/MG     | Skabersjo, Sweden                       | -                   | X              | -    |
| NRM588806   | FSC/MG     | Barseback, Sweden                       | -                   | X              | -    |
| NRM588810   | FSC/MG     | Gotland, Sweden                         | -                   | X              | -    |

|           |        |                                   |              |   |   |
|-----------|--------|-----------------------------------|--------------|---|---|
| NRM588812 | FSC/MG | Grundfors, Sweden                 | -            | X | - |
| NRM588831 | FSC/MG | Barseback, Sweden                 | -            | X | - |
| NRM588832 | FSC/MG | Uppsala, Sweden                   | -            | X | - |
| NRM588833 | FSC/MG | Uppsala, Sweden                   | -            | X | - |
| NRM588834 | FSC/MG | Uppsala, Sweden                   | -            | X | - |
| NRM588861 | FSC/MG | Hällefors, Sweden                 | -            | X | - |
| NRM588870 | FSC/MG | Hällefors, Sweden                 | -            | X | - |
| NRM588871 | FSC/MG | Hällefors, Sweden                 | -            | X | - |
| NRM595175 | RUS/MG | Kamchatka - Petropavlovsk, Russia | -            | X | - |
| NRM588865 | FSC/MG | Hällefors, Sweden                 | -            | X | - |
| NRM588815 | FSC/MW | Hällefors, Sweden                 | -            | X | - |
| NRM588809 | FSC/MW | Småland, Sweden                   | -            | X | - |
| NRM588845 | FSC/MW | Kinnekuille, Sweden               | -            | X | - |
| NRM588850 | FSC/MW | Hällefors, Sweden                 | -            | X | - |
| NRM588852 | FSC/MW | Hällefors, Sweden                 | -            | X | - |
| NRM588857 | FSC/MW | Hällefors, Sweden                 | -            | X | - |
| NRM588866 | FSC/MW | Hällefors, Sweden                 | -            | X | - |
| NRM588862 | FSC/MW | Hällefors, Sweden                 | -            | X | - |
| NRM592555 | RUS/MW | Kamchatka - Petropavlovsk, Russia | -            | X | - |
| NRM592556 | RUS/MW | Kamchatka - Petropavlovsk, Russia | -            | X | - |
| NRM598844 | FSC/MW | Kinnekuille, Sweden               | -            | X | - |
| NRM588859 | FSC/MW | Hällefors, Sweden                 | -            | X | - |
| NRM588860 | FSC/MW | Hällefors, Sweden                 | -            | X | - |
| NRM588838 | FSC/MW | Stockholmstrakten, Sweden         | -            | X | - |
| NRM588851 | FSC/MW | Hällefors, Sweden                 | -            | X | - |
| LTM.2012  | FSC    | Finland                           | SAMN12710276 | X | - |
| LTM.1726  | FSC    | Finland                           | SAMN12710277 | X | - |
| LTM.1727  | FSC    | Finland                           | -            | X | - |
| LTM.1728  | FSC    | Finland                           | -            | X | - |
| LTM.1729  | FSC    | Finland                           | SAMN12710278 | X | - |
| LTM.1730  | FSC    | Finland                           | SAMN12710279 | X | - |
| LTM.1731  | FSC    | Finland                           | SAMN12710280 | X | - |
| LTM.1732  | FSC    | Finland                           | -            | X | - |
| LTM.1733  | FSC    | Finland                           | SAMN12710286 | X | - |
| LTM.1734  | FSC    | Finland                           | -            | X | - |
| LTM.2191  | FSC    | Finland                           | SAMN12710281 | X | - |
| LTM.2192  | FSC    | Finland                           | SAMN12710282 | X | - |
| LTM.1749  | FSC    | Norway                            | SAMN12710283 | X | - |
| LTM.1750  | FSC    | Norway                            | SAMN12710284 | X | - |
| LTM.1751  | FSC    | Norway                            | SAMN12710285 | X | - |
| LTM.1752  | FSC    | Sweden                            | -            | X | - |
| LTM.1754  | FSC    | Sweden                            | SAMN12710287 | X | - |
| LTM.1755  | FSC    | Sweden                            | SAMN12710288 | X | - |
| LTM.1756  | FSC    | Sweden                            | SAMN12710289 | X | - |
| LTM.1757  | FSC    | Sweden                            | SAMN12710290 | X | - |
| LTM.1758  | FSC    | Sweden                            | -            | X | - |
| LTM.1759  | FSC    | Sweden                            | -            | X | - |
| LTM.1760  | FSC    | Sweden                            | -            | X | - |
| LTM.1761  | FSC    | Sweden                            | -            | X | - |

|          |     |             |              |   |   |
|----------|-----|-------------|--------------|---|---|
| LTM.1762 | FSC | Sweden      | SAMN12710291 | X | - |
| LTM.1763 | FSC | Sweden      | SAMN12710292 | X | - |
| LTM.1764 | FSC | Sweden      | -            | X | - |
| LTM.1765 | FSC | Sweden      | -            | X | - |
| LTM.1766 | FSC | Sweden      | SAMN12710293 | X | - |
| LTM.1768 | FSC | Sweden      | -            | X | - |
| LTM.1769 | FSC | Sweden      | -            | X | - |
| LTM.1770 | FSC | Sweden      | -            | X | - |
| LTM.1771 | FSC | Sweden      | -            | X | - |
| LTM.1772 | FSC | Sweden      | SAMN12710294 | X | - |
| LTM.1798 | ALP | Italy       | SAMN12710295 | - | - |
| LTM.1800 | ALP | Italy       | SAMN12710296 | - | - |
| LTM.1806 | ALP | Italy       | -            | X | - |
| LTM.1814 | ALP | Italy       | -            | X | - |
| LTM.1816 | ALP | Italy       | -            | X | - |
| LTM.1817 | ALP | Italy       | SAMN12710297 | X | - |
| LTM.1818 | ALP | Italy       | -            | X | - |
| LTM.1820 | ALP | Italy       | -            | X | - |
| LTM.1823 | ALP | Italy       | -            | X | - |
| LTM.1825 | ALP | Austria     | SAMN12710298 | X | - |
| LTM.1827 | ALP | Austria     | SAMN12710299 | X | - |
| LTM.1828 | ALP | Austria     | SAMN12710300 | X | - |
| LTM.2772 | ALP | France      | SAMN12710301 | X | X |
| LTM.2773 | ALP | France      | SAMN12710302 | X | - |
| LTM.2774 | ALP | France      | -            | X | - |
| LTM.2775 | ALP | France      | SAMN12710303 | X | - |
| LTM.2776 | ALP | France      | SAMN12710304 | X | - |
| LTM.3106 | ALP | France      | -            | X | - |
| LTM.3107 | ALP | France      | -            | X | - |
| LTM.3108 | ALP | France      | SAMN12710305 | X | - |
| LTM.3109 | ALP | France      | SAMN12710306 | X | - |
| LTM.3110 | ALP | France      | SAMN12710307 | X | - |
| LTM.3112 | ALP | Switzerland | -            | X | X |
| LTM.3113 | ALP | Switzerland | -            | - | X |
| LTM.3114 | ALP | Switzerland | -            | - | X |
| LTM.3116 | ALP | Switzerland | SAMN12710308 | X | X |
| LTM.3122 | ALP | Switzerland | SAMN12710309 | X | - |
| LTM.3199 | ALP | Switzerland | SAMN12710310 | X | - |
| LTM.3207 | ALP | Switzerland | SAMN12710311 | X | - |
| LTM.3228 | ALP | Switzerland | SAMN12710312 | X | - |
| LTM.3253 | ALP | Switzerland | SAMN12710313 | X | - |
| LTM.3262 | ALP | Switzerland | SAMN12710314 | X | - |

**Table S2.** Sequencing statistics for low individual coverage data: samples' codes, populations (FAR – the Faroe Islands, FSC – Fennoscandia, ALP – the Alps), number of raw paired reads, percentage of mapped reads and final mean coverage per site. Values in parentheses represent final mean coverage after subsampling.

| <b>Sample code</b> | <b>Population</b> | <b>Nr. raw paired reads</b> | <b>Mapped reads [%]</b> | <b>Final coverage [X]</b> |
|--------------------|-------------------|-----------------------------|-------------------------|---------------------------|
| LTM.3661           | FAR               | 12,829,381                  | 96.9                    | 0.90                      |
| LTM.3670           | FAR               | 10,096,944                  | 96.4                    | 0.78                      |
| LTM.3664           | FAR               | 9,567,273                   | 96.8                    | 0.72                      |
| LTM.3675           | FAR               | 16,454,576                  | 96.9                    | 1.28                      |
| LTM.3682           | FAR               | 20,538,870                  | 96.9                    | 1.52                      |
| LTM.3692           | FAR               | 7,959,334                   | 96.9                    | 0.61                      |
| LTM.3702           | FAR               | 11,256,419                  | 97.2                    | 0.82                      |
| LTM.3695           | FAR               | 6,476,635                   | 96.7                    | 0.50                      |
| LTM.3696           | FAR               | 14,221,459                  | 97.0                    | 1.06                      |
| LTM.3655           | FAR               | 16,520,101                  | 96.8                    | 1.28                      |
| LTM.3656           | FAR               | 8,655,408                   | 96.8                    | 0.68                      |
| LTM.3673           | FAR               | 12,022,197                  | 96.7                    | 0.94                      |
| LTM.3667           | FAR               | 9,083,660                   | 96.7                    | 0.71                      |
| LTM.3677           | FAR               | 8,137,461                   | 96.8                    | 0.64                      |
| LTM.3683           | FAR               | 7,759,607                   | 96.9                    | 0.61                      |
| LTM.3688           | FAR               | 9,575,665                   | 97.0                    | 0.75                      |
| LTM.3707           | FAR               | 10,459,376                  | 97.2                    | 0.82                      |
| LTM.3978           | FAR               | 9,293,011                   | 96.9                    | 0.73                      |
| LTM.3980           | FAR               | 8,439,113                   | 96.9                    | 0.67                      |
| LTM.3982           | FAR               | 10,041,109                  | 96.8                    | 0.79                      |
| LTM.1749           | FSC               | 10,208,547                  | 96.7                    | 0.76                      |
| LTM.1750           | FSC               | 12,886,291                  | 96.6                    | 0.96                      |
| LTM.1751           | FSC               | 11,483,086                  | 96.7                    | 0.88                      |
| LTM.1756           | FSC               | 8,474,247                   | 97.3                    | 0.62                      |
| LTM.1757           | FSC               | 7,057,106                   | 96.6                    | 0.50                      |
| LTM.1755           | FSC               | 50,218,055                  | 97.0                    | 3.90 (1.36)               |
| LTM.1762           | FSC               | 10,110,536                  | 96.3                    | 0.76                      |
| LTM.1766           | FSC               | 16,209,093                  | 96.7                    | 1.23                      |
| LTM.1772           | FSC               | 20,187,925                  | 97.0                    | 1.54                      |
| LTM.1754           | FSC               | 9,787,414                   | 97.0                    | 0.76                      |
| LTM.1763           | FSC               | 9,234,634                   | 96.3                    | 0.71                      |
| LTM.1726           | FSC               | 14,219,520                  | 96.7                    | 1.00                      |
| LTM.2012           | FSC               | 33,688,533                  | 96.7                    | 2.34 (1.17)               |
| LTM.1730           | FSC               | 10,693,297                  | 96.7                    | 0.73                      |
| LTM.1731           | FSC               | 16,246,618                  | 96.4                    | 1.08                      |
| LTM.2191           | FSC               | 18,605,267                  | 96.5                    | 1.19                      |
| LTM.2192           | FSC               | 10,434,252                  | 96.7                    | 0.60                      |
| LTM.1729           | FSC               | 14,318,970                  | 97.2                    | 1.11                      |
| LTM.1733           | FSC               | 14,029,706                  | 97.2                    | 1.05                      |
| LTM.2772           | ALP               | 10,288,174                  | 96.8                    | 0.77                      |
| LTM.2773           | ALP               | 10,609,990                  | 96.9                    | 0.80                      |
| LTM.2775           | ALP               | 15,163,631                  | 96.9                    | 1.14                      |

|          |     |            |      |      |
|----------|-----|------------|------|------|
| LTM.3109 | ALP | 11,707,114 | 96.9 | 0.88 |
| LTM.3108 | ALP | 9,937,167  | 96.9 | 0.78 |
| LTM.3110 | ALP | 8,673,602  | 97.2 | 0.68 |
| LTM.2776 | ALP | 8,934,439  | 96.8 | 0.69 |
| LTM.1825 | ALP | 12,022,278 | 96.7 | 0.86 |
| LTM.1827 | ALP | 21,154,620 | 97.0 | 1.39 |
| LTM.1828 | ALP | 8,937,741  | 97.0 | 0.70 |
| LTM.1800 | ALP | 8,386,434  | 96.8 | 0.64 |
| LTM.1798 | ALP | 14,207,625 | 96.4 | 1.06 |
| LTM.1817 | ALP | 12,615,520 | 96.7 | 0.94 |
| LTM.3116 | ALP | 15,012,254 | 97.0 | 1.06 |
| LTM.3122 | ALP | 8,589,038  | 96.8 | 0.60 |
| LTM.3253 | ALP | 15,715,612 | 97.1 | 1.08 |
| LTM.3199 | ALP | 11,477,056 | 97.0 | 0.80 |
| LTM.3228 | ALP | 12,101,462 | 97.1 | 0.76 |
| LTM.3207 | ALP | 8,995,964  | 96.9 | 0.70 |
| LTM.3262 | ALP | 9,693,029  | 97.0 | 0.74 |

---



**Table S3.** Information on higher depth individual whole-genome resequencing data used in this study: species, samples' codes, localities of origin (FAR – Faroe Islands; FSC – Fennoscandia; ALP – Alps), coverage, NCBI Sequence Read Archive (SRA) BioSample accession number and reference.

| Species                | Sample code | Origin            | Coverage [X] | SRA BioSample | Reference  |
|------------------------|-------------|-------------------|--------------|---------------|------------|
| <i>L. timidus</i>      | LTM.3978    | FAR/Signabøur     | 6.9          | SAMN12710256  | this study |
|                        | LTM.2012    | FSC/Finland       | 17.9         | SAMN07526960  | (3)        |
|                        | LTM.3109    | ALP/France        | 22.0         | SAMN07526962  | (3)        |
| <i>L. europaeus</i>    | LER.1515    | Spain/Navarra     | 15.7         | SAMN12618118  | (2)        |
|                        | LER.1639    | Austria/Vienna    | 10.8         | SAMN12618122  | (2)        |
| <i>L. granatensis</i>  | LGR.2553    | Spain/Ciudad Real | 20.8         | SAMN07526967  | (3)        |
|                        | LGR.2544    | Spain/Navarra     | 21.8         | SAMN07526972  | (3)        |
| <i>L. americanus</i>   | Allab3      | USA/Pennsylvania  | 6.8          | SAMN08146528  | (4)        |
|                        | DOlsen1     | USA/Utah          | 6.8          | SAMN08146529  | (4)        |
|                        | A0961       | USA/Montana       | 29.3         | SAMN08146494  | (4)        |
| <i>L. californicus</i> | MacKay2     | USA/Nevada        | 6.1          | SAMN08146530  | (4)        |
|                        | MacKay3     | USA/Nevada        | 7.1          | SAMN08146531  | (4)        |
| <i>L. castroviejoi</i> | LCS.1991    | Spain/León        | 10.0         | SAMN12640762  | this study |

**Table S4.** Approximate Bayesian Computation demographic modelling. Prior and posterior distributions of parameters' estimate (marginal density P-value: 0.73, Tukey depth P-value: 0.74), based on PLS transformed data.  $N_{FSC}$  – effective population size of the Fennoscandian population;  $N_{FAR}$  – effective population size of the Faroese population;  $N_F$  – effective population size of the Faroese hare founder population;  $T_i$  – time of the introduction in generations;  $\mu$  – mutation rate in units of mutations per site per generation;  $g$  – growth rate (negative value backward in time implies expansion forward in time; calculated according to the equation  $N_F = N_{FAR} e^{gT_i}$ ). Effective population sizes are reported as haploid numbers.

| Parameter | Prior  |         | Posterior characteristics |         |         |             |             |
|-----------|--------|---------|---------------------------|---------|---------|-------------|-------------|
|           | Min    | Max     | Mode                      | Mean    | Median  | HDI95-lower | HDI95-upper |
| $N_{FSC}$ | 10,000 | 250,000 | 225,758                   | 182,100 | 188,760 | 96,793      | 249999      |
| $N_{FAR}$ | 10     | 250,000 | 73,216                    | 123,794 | 120,565 | 39,143      | 212,645     |
| $N_F$     | 2      | 50      | 20                        | 21      | 20      | 6           | 42          |
| $T_i$     | 50     | 500     | 73                        | 109     | 104     | 50          | 184         |
| $\mu$     | 1e-9   | 1e-7    | 6.0e-09                   | 7.7e-09 | 7.3e-09 | 1e-09       | 1.6e-08     |
| $g$       | -      | -       | -0.080                    | -0.094  | -0.088  | -0.166      | -0.036      |

**Table S5.** Sequences of PCR primers used to confirm and genotype the insertion-deletion detected in the *Agouti* association region. The coordinates on the European rabbit reference genome are shown (*OryCun2.0*). The reverse primer (*LTM\_indel\_R*) is common to all three PCRs.

| <b>Primer</b> | <b>Sequence (5'-3')</b> | <b>Coordinates</b> | <b>PCR product [bp]</b> |
|---------------|-------------------------|--------------------|-------------------------|
| LTM_indel_F1  | GACAATACCATGGGCCATAAA   | 4:5,489,246-       | 266 (deletion)          |
| LTM_indel_F01 | AAGAGCAGCTGGGAAACAAA    | 4:5,490,280-       | 406 (no deletion)       |
| LTM_indel_F2  | GAGATCTCTGAAATACCCAAATA | 4:5,489,350-       | 165 (deletion)          |
| LTM_indel_F3  | TTCTGGGTCTCCTACATCAGGT  | 4:5,490,513-       | 173 (no deletion)       |
| LTM_indel_R   | TGCTGCTGTGGCGTAAGTAG    | 4:5,490,666-       |                         |

**Table S6.** Genotypes at selected SNPs and insertion-deletion along the *Agouti* region (chromosome 4). Rows depict individuals and columns represent site coordinates according to the rabbit genome (*OryCun2.0*). Colors are concordant with Fig. 2C, i.e. black: homozygous Faroese variant, light grey: homozygous alternative variant, dark grey: heterozygous, and white: missing data.

| Origin | Specimen Code | Agouti region (chromosome 4) |          |          |          |          |          |          |          |          |          |          |          |          |          |          |        |          |          |          |          |          |          |          |          |          |          |          |          |          |          |          |          |          |          |          |          |          |
|--------|---------------|------------------------------|----------|----------|----------|----------|----------|----------|----------|----------|----------|----------|----------|----------|----------|----------|--------|----------|----------|----------|----------|----------|----------|----------|----------|----------|----------|----------|----------|----------|----------|----------|----------|----------|----------|----------|----------|----------|
|        |               | 5387 616                     | 5404 147 | 5407 210 | 5419 007 | 5441 387 | 5445 294 | 5445 964 | 5452 657 | 5455 802 | 5457 584 | 5458 411 | 5460 551 | 5466 404 | 5472 145 | 5480 355 | IND EL | 5492 509 | 5495 138 | 5501 424 | 5530 769 | 5532 471 | 5533 873 | 5558 350 | 5581 471 | 5589 277 | 5599 413 | 5624 495 | 5660 971 | 5667 845 | 5674 077 | 5677 222 | 5683 247 | 5686 590 | 5720 878 | 5725 962 | 5739 201 | 5745 165 |
| FSC/MG | NRM588802     | TT                           | GG       | TT       | CC       | GG       | AA       | AA       | AA       | TT       | 0        | AA       | TT       | CC       | AA       | CC       | DEL    | CC       | CC       | CC       | AA       | TT       | CC       | GG       | GG       | GG       | AA       | TT       | TT       | GG       | CC       | CC       | TT       | CC       | AA       | TT       | AA       | CC       |
| FSC/MG | NRM588803     | GT                           | GG       | TT       | CC       | GG       | AA       | AA       | AA       | TT       | CC       | AA       | TT       | CC       | AA       | CC       | DEL    | CC       | CC       | CC       | AA       | TT       | CC       | GG       | GG       | GG       | AA       | TT       | TC       | GT       | CA       | CT       | CT       | CT       | AG       | CT       | CA       | CA       |
| FSC/MG | NRM588806     | TT                           | GG       | TT       | CC       | GG       | AA       | AA       | AA       | TT       | CC       | AA       | TT       | CC       | AA       | CC       | DEL    | CC       | CC       | CC       | AA       | TT       | CC       | GG       | GG       | GG       | AA       | TT       | TT       | GG       | CC       | CC       | TT       | CC       | AA       | TT       | AA       | CC       |
| FSC/MG | NRM588810     | TT                           | GG       | TT       | CC       | GG       | AA       | AA       | AA       | TT       | CC       | AA       | TT       | CC       | AA       | CC       | DEL    | CC       | CC       | CC       | AA       | TT       | CC       | GG       | GG       | GG       | AA       | TT       | TT       | GG       | CC       | CC       | TT       | CC       | AA       | TT       | AA       | CC       |
| FSC/MG | NRM588812     | GT                           | GA       | TC       | TC       | GG       | AA       | AA       | AA       | TT       | CC       | AA       | TT       | CC       | AA       | CC       | DEL    | CC       | CC       | CC       | AA       | TT       | CC       | GG       | GG       | GG       | AA       | TT       | TT       | GG       | CC       | CC       | TT       | CC       | AA       | TT       | AA       | CC       |
| FSC/MG | NRM588831     | GT                           | GA       | TC       | TC       | GG       | AA       | AA       | AA       | TT       | CC       | AA       | TT       | CC       | AA       | CC       | DEL    | CC       | CC       | CC       | AA       | TT       | CC       | GG       | GG       | GG       | AA       | TT       | TT       | GG       | CC       | CC       | TT       | CC       | AA       | TT       | AA       | CC       |
| FSC/MG | NRM588832     | GT                           | GG       | TT       | CC       | GG       | AA       | AA       | AA       | TT       | CC       | AA       | TT       | CC       | AA       | CC       | DEL    | CC       | CC       | CC       | AA       | TT       | CC       | GG       | GG       | GG       | GA       | TC       | TC       | GT       | CA       | CT       | CT       | CT       | AG       | CT       | CA       | CA       |
| FSC/MG | NRM588833     | TT                           | GG       | TT       | CC       | GG       | AA       | AA       | AA       | TT       | CC       | AA       | TT       | CC       | AA       | CC       | DEL    | CC       | CC       | CC       | AA       | TT       | CC       | GG       | GG       | GG       | AA       | TT       | TT       | GG       | CC       | CC       | TT       | CC       | AA       | TT       | AA       | CC       |
| FSC/MG | NRM588834     | TT                           | GG       | TT       | CC       | GG       | AA       | AA       | AA       | TT       | CC       | 0        | TT       | CC       | AA       | CC       | DEL    | CC       | CC       | CC       | AA       | TT       | CC       | GG       | GG       | GG       | AA       | TT       | CC       | TT       | AA       | TT       | CC       | TT       | GG       | CC       | CC       | AA       |
| FSC/MG | NRM588861     | GT                           | GG       | TT       | CC       | GG       | AA       | AA       | AA       | TT       | CC       | AA       | TT       | CC       | AA       | CC       | DEL    | CC       | CC       | CC       | AA       | TT       | CC       | GG       | GG       | GG       | AA       | TT       | TT       | GG       | CC       | CC       | TT       | CC       | AA       | TT       | AA       | CC       |
| FSC/MG | NRM588870     | TT                           | GG       | TT       | CC       | GG       | AA       | AA       | AA       | TT       | CC       | 0        | TT       | CC       | AA       | CC       | DEL    | CC       | CC       | CC       | AA       | TT       | CC       | GG       | GG       | GG       | AA       | TT       | TT       | GG       | CC       | CC       | TT       | CC       | AA       | TT       | AA       | CC       |
| FSC/MG | NRM588871     | GT                           | GA       | TT       | CC       | GG       | AA       | AA       | AA       | TT       | CC       | AA       | TT       | CC       | AA       | CC       | DEL    | CC       | CC       | CC       | AA       | TT       | CC       | GG       | GG       | GG       | AA       | TT       | TT       | GG       | CC       | CC       | TT       | CC       | AA       | TT       | AA       | CC       |
| RUS/MG | NRM59175      | TT                           | GG       | TT       | CC       | GG       | AA       | AA       | AA       | TT       | CC       | AA       | TT       | CC       | AA       | CC       | DEL    | CC       | CC       | CC       | AA       | TT       | CC       | GG       | GG       | GG       | AA       | TT       | TT       | GG       | CC       | CC       | TT       | CC       | AA       | TT       | AA       | CC       |
| FSC/MG | NRM588865     | GT                           | AA       | CC       | TT       | AG       | GA       | GA       | CA       | TC       | CC       | CA       | TT       | CT       | AA       | CT       | HET    | CT       | TC       | CT       | AA       | CT       | CA       | GA       | GT       | GA       | GA       | TC       | TC       | GT       | CA       | CT       | CT       | CT       | AG       | CT       | CA       | CA       |
| FSC/MW | NRM588815     | GG                           | AA       | CC       | TT       | AA       | GG       | GG       | CC       | CC       | TT       | CC       | CC       | TT       | AG       | TT       | INS    | TT       | TT       | TT       | GG       | CC       | AA       | AA       | TT       | AA       | GG       | CC       | CC       | TT       | AA       | TT       | CC       | TT       | GG       | CC       | CC       | AA       |
| FSC/MW | NRM588809     | GG                           | AA       | CC       | TC       | AA       | GG       | GG       | CC       | CC       | TT       | CC       | CC       | TT       | GG       | TT       | INS    | TT       | TT       | TT       | GG       | CC       | AA       | AA       | TT       | AA       | GG       | CC       | CC       | TT       | AA       | TT       | CC       | TT       | GG       | CC       | CC       | AA       |
| FSC/MW | NRM588845     | GG                           | AA       | CC       | TT       | AA       | GG       | GG       | CC       | CC       | TT       | CC       | CC       | TT       | GG       | TT       | INS    | TT       | TT       | TT       | GG       | CC       | AA       | AA       | TT       | AA       | GG       | CC       | CC       | TT       | AA       | TT       | CC       | TT       | GG       | CC       | CC       | AA       |
| FSC/MW | NRM588850     | GG                           | AA       | CC       | TT       | AA       | GG       | GG       | CC       | CC       | TT       | CA       | CC       | TT       | GG       | TT       | INS    | TT       | TT       | TT       | GG       | CC       | AA       | AA       | TT       | AA       | GG       | CC       | CC       | TT       | AA       | TT       | CC       | TT       | GG       | CC       | CC       | AA       |
| FSC/MW | NRM588852     | GT                           | AA       | CC       | TT       | AA       | GG       | GG       | CC       | CC       | TT       | CC       | CC       | TT       | GG       | TT       | INS    | TT       | TT       | TT       | GG       | CC       | AA       | AA       | TT       | AA       | GG       | CC       | CC       | TT       | AA       | TT       | CC       | TT       | GG       | CC       | CC       | AA       |
| FSC/MW | NRM588857     | GT                           | AA       | CC       | TT       | AA       | GG       | GG       | CC       | CC       | TT       | CC       | CC       | TT       | AG       | TT       | INS    | TT       | TT       | TT       | GG       | CC       | AA       | AA       | TT       | AA       | GG       | CC       | CC       | TT       | AA       | TT       | CC       | TT       | GG       | CC       | CC       | AA       |
| FSC/MW | NRM588866     | GG                           | GA       | TT       | CC       | AA       | GG       | GG       | CC       | CC       | TT       | CC       | CC       | TT       | AG       | TT       | INS    | TT       | TT       | TT       | GG       | CC       | AA       | AA       | TT       | AA       | GG       | CC       | CC       | TT       | AA       | TT       | CC       | TT       | GG       | CC       | CC       | AA       |
| FSC/MW | NRM588862     | TT                           | AA       | CC       | TT       | AA       | GG       | GG       | CC       | CC       | TT       | CC       | CC       | TT       | AG       | TT       | INS    | TT       | TT       | TT       | 0        | CC       | AA       | AA       | TT       | AA       | GG       | CC       | CC       | TT       | AA       | TT       | CC       | TT       | GG       | CC       | CC       | AA       |
| RUS/MW | NRM592555     | GT                           | AA       | CC       | TT       | AA       | GG       | GG       | CC       | CC       | TT       | CC       | CC       | TT       | AA       | TT       | INS    | TT       | TT       | TT       | GG       | CC       | AA       | AA       | TT       | AA       | GG       | CC       | CC       | TT       | AA       | TT       | CC       | TT       | GG       | CC       | CC       | AA       |
| RUS/MW | NRM592556     | GT                           | AA       | CC       | TT       | AA       | GG       | GG       | CC       | CC       | TT       | CC       | CC       | TT       | AA       | TT       | INS    | TT       | TT       | TT       | GG       | CC       | AA       | AA       | TT       | AA       | GG       | CC       | CC       | TT       | AA       | TT       | CC       | TT       | GG       | CC       | CC       | AA       |
| FSC/MW | NRM598844     | GT                           | GA       | CC       | TT       | AA       | GG       | GG       | CC       | CC       | TT       | CC       | CC       | TT       | AG       | TT       | INS    | TT       | TT       | TT       | GG       | CC       | AA       | AA       | TT       | AA       | GG       | CC       | CC       | TT       | AA       | TT       | CC       | TT       | GG       | CC       | CC       | AA       |
| FSC/MW | NRM588859     | GT                           | GA       | TC       | TC       | AA       | GG       | GG       | CC       | CC       | TT       | CC       | CC       | TT       | GG       | TT       | INS    | TT       | TT       | TT       | GG       | CC       | AA       | AA       | TT       | AA       | GG       | CC       | CC       | TT       | AA       | TT       | CC       | TT       | GG       | CC       | CC       | AA       |
| FSC/MW | NRM588860     | GT                           | GA       | TC       | TC       | AA       | GG       | GG       | CC       | CC       | TT       | CA       | CC       | TT       | GG       | TT       | INS    | TT       | TT       | TT       | GG       | CC       | AA       | AA       | TT       | AA       | GG       | CC       | CC       | TT       | AA       | TT       | CC       | TT       | GG       | CC       | CC       | AA       |
| FSC/MW | NRM588838     | GG                           | AA       | CC       | TT       | AG       | GA       | GA       | CA       | TC       | CT       | CA       | TC       | CT       | AG       | CT       | HET    | CT       | TC       | CT       | 0        | CT       | CA       | GA       | GT       | GA       | GA       | TC       | TC       | GT       | CA       | CT       | CT       | CT       | AG       | CT       | CA       | CA       |
| FSC/MW | NRM588851     | GT                           | GA       | TC       | TC       | AG       | GA       | GA       | CA       | TC       | CT       | CA       | TC       | CT       | AG       | CT       | HET    | CT       | TC       | CT       | 0        | CT       | CA       | GA       | GT       | GA       | GA       | TC       | TC       | GT       | CA       | CT       | CT       | CT       | AG       | CT       | CA       | CA       |
| FAR    | LTM.3655      | TT                           | GG       | TT       | CC       | GG       | AA       | AA       | AA       | TT       | CC       | AA       | TT       | CC       | AA       | CC       | DEL    | CC       | CC       | CC       | AA       | TT       | CC       | GG       | GG       | GG       | AA       | TT       | TT       | GG       | CC       | CC       | TT       | CC       | AA       | TT       | AA       | CC       |
| FAR    | LTM.3656      | TT                           | GG       | TT       | CC       | GG       | AA       | AA       | AA       | TT       | CC       | AA       | TT       | CC       | AA       | 0        | DEL    | CC       | CC       | CC       | AA       | TT       | CC       | GG       | GG       | GG       | AA       | TT       | TT       | GG       | CC       | CC       | TT       | CC       | AA       | TT       | AA       | CC       |
| FAR    | LTM.3658      | TT                           | GG       | TT       | CC       | GG       | AA       | AA       | AA       | TT       | CC       | AA       | TT       | CC       | AA       | CC       | DEL    | CC       | CC       | CC       | AA       | TT       | CC       | GG       | GG       | GG       | AA       | TT       | TT       | GG       | CC       | CC       | TT       | CC       | AA       | TT       | AA       | CC       |
| FAR    | LTM.3659      | TT                           | GG       | TT       | CC       | GG       | AA       | AA       | AA       | TT       | CC       | AA       | TT       | CC       | AA       | CC       | DEL    | CC       | CC       | CC       | AA       | TT       | CC       | GG       | GG       | GG       | AA       | TT       | TT       | GG       | CC       | CC       | TT       | CC       | AA       | TT       | AA       | CC       |
| FAR    | LTM.3661      | TT                           | GG       | TT       | CC       | GG       | AA       | AA       | AA       | TT       | CC       | AA       | TT       | CC       | AA       | 0        | DEL    | CC       | CC       | CC       | AA       | TT       | CC       | GG       | GG       | GG       | AA       | TT       | TT       | GG       | CC       | CC       | TT       | CC       | AA       | TT       | AA       | CC       |
| FAR    | LTM.3663      | TT                           | GG       | TT       | CC       | GG       | AA       | AA       | AA       | TT       | CC       | AA       | TT       | CC       | AA       | CC       | DEL    | CC       | CC       | CC       | AA       | TT       | CC       | GG       | GG       | GG       | AA       | TT       | TT       | GG       | CC       | CC       | TT       | CC       | AA       | TT       | AA       | CC       |
| FAR    | LTM.3664      | TT                           | GG       | TT       | CC       | GG       | AA       | AA       | AA       | TT       | CC       | AA       | TT       | CC       | AA       | CC       | DEL    | CC       | CC       | CC       | AA       | TT       | CC       | GG       | GG       | GG       | AA       | TT       | TT       | GG       | CC       | CC       | TT       | CC       | AA       | TT       | AA       | CC       |
| FAR    | LTM.3667      | TT                           | GG       | TT       | CC       | GG       | AA       | AA       | AA       | TT       | CC       | AA       | TT       | CC       | AA       | CC       | DEL    | CC       | CC       | CC       | AA       | TT       | CC       | GG       | GG       | GG       | AA       | TT       | TT       | GG       | CC       | CC       | TT       | CC       | AA       | TT       | AA       | CC       |
| FAR    | LTM.3668      | TT                           | GG       | TT       | CC       | GG       | AA       | AA       | AA       | TT       | CC       | AA       | TT       | CC       | AA       | 0        | DEL    | CC       | CC       | CC       | AA       | TT       | CC       | GG       | GG       | GG       | AA       | TT       | TT       | GG       | CC       | CC       | TT       | CC       | AA       | TT       | AA       | CC       |
| FAR    | LTM.3670      | TT                           | GG       | TT       | CC       | GG       | AA       | AA       | AA       | TT       | CC       | AA       | TT       | CC       | AA       | 0        | DEL    | CC       | CC       | CC       | AA       | TT       | CC       | GG       | GG       | GG       | AA       | TT       | TT       | GG       | CC       | CC       | TT       | CC       | AA       | TT       | AA       | CC       |
| FAR    | LTM.3672      | TT                           | GG       | TT       | CC       | GG       | AA       | AA       | AA       | TT       | CC       | AA       | TT       | CC       | AA       | 0        | DEL    | CC       | CC       | CC       | AA       | TT       | CC       | GG       | GG       | GG       | AA       | TT       | TT       | GG       | CC       | CC       | TT       | CC       | AA       | TT       | AA       | CC       |
| FAR    | LTM.3673      | TT                           | GG       | TT       | CC       | GG       | AA       | AA       | AA       | TT       | CC       | AA       | TT       | CC       | AA       | CC       | DEL    | CC       | CC       | CC       | AA       | TT       | CC       | GG       | GG       | GG       | AA       | TT       | TT       | GG       | CC       | CC       | TT       | CC       | AA       | TT       | AA       | CC       |
| FAR    | LTM.3674      | TT                           | GG       | TT       | CC       | GG       | AA       | AA       | AA       | TT       | CC       | AA       | TT       | CC       | AA       | 0        | DEL    | CC       | CC       | CC       | AA       | TT       | CC       | GG       | GG       | GG       | AA       | TT       | TT       | GG       | CC       | CC       | TT       | CC       | AA       | TT       | AA       | CC       |
| FAR    | LTM.3675      | TT                           | GG       | TT       | CC       | GG       | AA       | AA       | AA       | TT       | CC       | AA       | TT       | CC       | AA       | CC       | DEL    | CC       | CC       | CC       | AA       | TT       | CC       | GG       | GG       | GG       | AA       | TT       | TT       | GG       | CC       | CC       | TT       | CC       | AA       | TT       | AA       | CC       |
| FAR    | LTM.3677      | TT                           | GG       | TT       | CC       | GG       | AA       | AA       | AA       | TT       | CC       | AA       | TT       | CC       | AA       | CC       | DEL    | CC       | CC       | CC       | AA       | TT       | CC       | GG       | GG       | GG       | AA       | TT       | TT       | GG       | CC       | CC       | TT       | CC       | AA       | TT       | AA       | CC       |
| FAR    | LTM.3678      | TT                           | GG       | TT       | CC       | GG       | AA       | AA       | AA       | TT       | CC       | AA       | TT       | CC       | AA       | 0        | DEL    | CC       | CC       | CC       | AA       | TT       | CC       | GG       | GG       | GG       | AA       | TT       | TT       | GG       | CC       | CC       | TT       | CC       | AA       | TT       | AA       | CC       |
| FAR    | LTM.3680      | TT                           | GG       | TT       | CC       | GG       | AA       | AA       | AA       | TT       | CC       | AA       | TT       | CC       | AA       | 0        | DEL    | CC       | CC       | CC       | AA       | TT       | CC       | GG       | GG       | GG       | AA       | TT       | TT       | GG       | CC       | CC       | TT       | CC       | AA       | TT       | AA       | CC       |
| FAR    | LTM.3682      | TT                           | GG       | TT       | CC       | GG       | AA       | AA       | AA       | TT       | CC       | AA       | TT       | CC       | AA       | CC       | DEL    | CC       | CC       | CC       | AA       | TT       | CC       | GG       | GG       | GG       | AA       | TT       | TT       | GG       | CC       | CC       | TT       | CC       | AA       | TT       | AA       | CC       |
| FAR    | LTM.3683      | TT                           | GG       | TT       | CC       | GG       | AA       | AA       | AA       | TT       |          |          |          |          |          |          |        |          |          |          |          |          |          |          |          |          |          |          |          |          |          |          |          |          |          |          |          |          |



**Table S7.** Genotypes at selected SNPs in the *USP38* gene region (chromosome 15) and genome-wide. Rows depict individuals and columns represent site coordinates according to the rabbit genome (*OryCun2.0*; chromosome: site). Colors are concordant with Fig. 2C, i.e. black: homozygous Faroese variant, light grey: homozygous alternative variant, dark grey: heterozygous, and white: missing data.

| Origin | Specimen Code | <i>Usp38</i> region (chromosome:site) |                 |                 |                 |                 | Genome wide (chromosome:site) |                |                 |                |                 |               |                |                |                |                |                |                |                |                 |                 |                 |                 |                 |
|--------|---------------|---------------------------------------|-----------------|-----------------|-----------------|-----------------|-------------------------------|----------------|-----------------|----------------|-----------------|---------------|----------------|----------------|----------------|----------------|----------------|----------------|----------------|-----------------|-----------------|-----------------|-----------------|-----------------|
|        |               | 15:212267<br>63                       | 15:212366<br>41 | 15:213519<br>40 | 15:213529<br>56 | 15:213732<br>27 | 1:34929<br>82                 | 1:232574<br>58 | 2:1113582<br>24 | 3:688624<br>73 | 3:1445514<br>71 | 4:72246<br>15 | 4:207793<br>95 | 4:219990<br>72 | 4:232361<br>52 | 4:238188<br>53 | 5:329094<br>37 | 6:131284<br>52 | 7:451944<br>36 | 12:917999<br>89 | 13:768437<br>55 | 14:430055<br>58 | 17:744891<br>91 | 18:481934<br>91 |
| FSC/MG | NRM588802     | 0                                     | 0               | AA              | GG              | GG              | TT                            | 0              | TT              | 0              | CC              | CC            | 0              | 0              | TC             | TT             | 0              | 0              | AA             | 0               | 0               | 0               | GG              | TT              |
| FSC/MG | NRM588803     | GG                                    | CC              | AA              | GG              | GG              | GT                            | GG             | 0               | 0              | CT              | TC            | GG             | GG             | CC             | TT             | CC             | GG             | AA             | AA              | GA              | TC              | GG              | CC              |
| FSC/MG | NRM588806     | GG                                    | CC              | AA              | GG              | GG              | TT                            | 0              | TT              | CG             | CC              | CC            | GG             | GG             | TC             | TT             | AA             | GG             | AA             | GG              | GG              | TT              | GG              | TT              |
| FSC/MG | NRM588810     | GG                                    | CC              | AA              | GG              | GG              | GT                            | GG             | TT              | CC             | CC              | TC            | GG             | GG             | TC             | CT             | CC             | GG             | AA             | AG              | GG              | TT              | GG              | CT              |
| FSC/MG | NRM588812     | GG                                    | CC              | AG              | GA              | GT              | TT                            | GG             | TT              | CG             | TT              | CC            | GG             | GG             | TC             | TT             | CA             | GG             | AA             | GG              | GG              | TT              | AG              | CT              |
| FSC/MG | NRM588831     | GG                                    | CC              | AA              | GG              | GG              | TT                            | GG             | TT              | 0              | TT              | TC            | GG             | GA             | TT             | TT             | CA             | GG             | AG             | AG              | GG              | TC              | GG              | TT              |
| FSC/MG | NRM588832     | AA                                    | TT              | GG              | AA              | TT              | TT                            | GA             | TA              | CG             | CC              | TC            | GG             | GG             | TC             | TT             | CC             | CG             | AG             | GG              | 0               | TT              | GG              | TT              |
| FSC/MG | NRM588833     | GG                                    | CC              | AA              | GG              | GG              | TT                            | GG             | TT              | 0              | CC              | TC            | 0              | GG             | CC             | TT             | CA             | CC             | AA             | GG              | GG              | TC              | AA              | CT              |
| FSC/MG | NRM588834     | GG                                    | CC              | AA              | GG              | GG              | TT                            | GA             | TT              | CG             | CC              | TC            | GG             | GG             | TT             | TT             | AA             | CG             | AG             | GG              | GA              | TC              | AG              | TT              |
| FSC/MG | NRM588861     | GG                                    | CC              | AA              | GG              | GG              | GT                            | AA             | TT              | CC             | CC              | CC            | GG             | GG             | TT             | CT             | CA             | CG             | AA             | GG              | GA              | TC              | GG              | TT              |
| FSC/MG | NRM588870     | AG                                    | TC              | AA              | GG              | GT              | GT                            | GG             | TA              | 0              | CC              | CC            | 0              | GG             | TT             | TT             | CC             | CG             | AA             | GG              | GG              | CC              | GG              | TT              |
| FSC/MG | NRM588871     | GG                                    | CC              | AA              | GG              | GG              | GT                            | AA             | AA              | CC             | CC              | CC            | GG             | GG             | TT             | CT             | CC             | CG             | AA             | AA              | GA              | TC              | GG              | CT              |
| RUS/MG | NRM595175     | GG                                    | CC              | AA              | GG              | GG              | GT                            | GG             | TT              | CG             | CC              | CC            | GG             | GG             | TC             | TT             | CA             | CG             | AG             | AG              | GA              | 0               | GG              | TT              |
| FSC/MG | NRM588865     | GG                                    | CC              | AA              | GG              | GG              | TT                            | GG             | TT              | CG             | CT              | CC            | GG             | GG             | TC             | CT             | CA             | GG             | AG             | AG              | GA              | TT              | AG              | CT              |
| FSC/MW | NRM588815     | GG                                    | CC              | AA              | GG              | GG              | TT                            | GA             | TT              | CC             | CT              | CC            | GG             | GG             | TC             | TT             | CC             | CG             | AG             | AG              | 0               | TC              | GG              | TT              |
| FSC/MW | NRM588809     | AG                                    | TC              | AA              | GG              | GG              | TT                            | GG             | TT              | CG             | CT              | CC            | GG             | GG             | TT             | TT             | CC             | CG             | AA             | AG              | GG              | TC              | AA              | CT              |
| FSC/MW | NRM588845     | AG                                    | TC              | AG              | GA              | GT              | TT                            | 0              | TT              | 0              | CC              | CC            | 0              | AA             | TT             | TT             | CC             | CC             | AA             | AG              | GG              | TT              | GG              | TT              |
| FSC/MW | NRM588850     | GG                                    | CC              | AA              | GG              | GG              | TT                            | AA             | TT              | CC             | CT              | TT            | GG             | GG             | TT             | TT             | CA             | CG             | AA             | AA              | GA              | TC              | GG              | CT              |
| FSC/MW | NRM588852     | AG                                    | TC              | AA              | GG              | GG              | TT                            | GA             | 0               | CC             | CC              | CC            | GG             | GG             | TC             | TT             | AA             | CG             | AA             | GG              | GG              | TC              | GG              | CT              |
| FSC/MW | NRM588857     | GG                                    | CC              | AA              | GG              | GG              | TT                            | GG             | TT              | CC             | CC              | CC            | GG             | GG             | TT             | TT             | CC             | CG             | AA             | GG              | GA              | TC              | GG              | TT              |
| FSC/MW | NRM588866     | GG                                    | CC              | AA              | GG              | GG              | TT                            | GG             | TT              | CG             | CT              | CC            | GG             | AA             | TT             | CT             | 0              | CG             | AG             | GG              | GA              | 0               | GG              | TT              |
| FSC/MW | NRM588862     | AG                                    | TC              | AG              | GA              | GG              | TT                            | GA             | 0               | CC             | CC              | CC            | GG             | GA             | TC             | CT             | CA             | CG             | AA             | AG              | AA              | CC              | GG              | TT              |
| RUS/MW | NRM592555     | GG                                    | CC              | AA              | GG              | GG              | TT                            | AA             | TT              | CC             | CC              | CC            | GG             | GG             | TT             | TT             | CC             | CG             | AA             | GG              | AA              | TT              | GG              | TT              |
| RUS/MW | NRM592556     | GG                                    | CC              | AA              | GG              | GG              | TT                            | GA             | TT              | CC             | CC              | CC            | GG             | GG             | TT             | TT             | CC             | CG             | AG             | GG              | GA              | TT              | GG              | TT              |
| FSC/MW | NRM598844     | GG                                    | CC              | AA              | GG              | GG              | TT                            | AA             | TT              | CC             | CC              | CC            | GG             | GA             | TT             | TT             | CC             | CG             | AG             | AG              | GG              | TT              | GG              | TT              |
| FSC/MW | NRM588859     | AG                                    | TC              | AA              | GG              | GG              | GT                            | GA             | TA              | CC             | CT              | TC            | GG             | GA             | TC             | TT             | 0              | CG             | AG             | GG              | 0               | 0               | GG              | TT              |
| FSC/MW | NRM588860     | GG                                    | CC              | AG              | GA              | GT              | TT                            | 0              | TT              | CG             | CC              | CC            | GG             | GG             | TT             | CC             | CA             | CC             | GG             | AG              | GA              | CC              | GG              | CT              |
| FSC/MW | NRM588838     | GG                                    | CC              | AA              | GG              | GG              | GT                            | GG             | TT              | CC             | CC              | CC            | GA             | GA             | TT             | TT             | CC             | GG             | AG             | GG              | GG              | TT              | GG              | TT              |
| FSC/MW | NRM588851     | AG                                    | TC              | AG              | GA              | GT              | TT                            | GA             | TT              | CC             | CC              | TC            | GG             | GG             | TT             | CT             | CA             | GG             | AG             | GG              | AA              | TT              | AG              | CT              |
| FAR    | LTM.3655      | AA                                    | 0               | GG              | AA              | TT              | GG                            | AA             | AA              | GG             | TT              | TT            | AA             | AA             | CC             | CC             | AA             | CC             | GG             | AA              | AA              | 0               | AA              | CC              |
| FAR    | LTM.3656      | AA                                    | TT              | GG              | AA              | TT              | GG                            | AA             | AA              | GG             | TT              | TT            | AA             | AA             | CC             | CC             | CA             | CC             | GG             | AA              | AA              | CC              | AG              | CC              |
| FAR    | LTM.3658      | AA                                    | 0               | GG              | AA              | TT              | GT                            | AA             | AA              | GG             | TT              | TT            | GA             | GA             | TC             | CC             | AA             | CC             | GG             | AG              | AA              | 0               | AG              | CC              |
| FAR    | LTM.3659      | AA                                    | TT              | GG              | AA              | TT              | GG                            | AA             | AA              | GG             | TT              | TT            | AA             | AA             | CC             | CC             | AA             | CC             | AG             | AA              | AA              | CC              | AA              | CC              |
| FAR    | LTM.3661      | AA                                    | TT              | GG              | AA              | TT              | GT                            | AA             | AA              | GG             | TT              | TT            | GA             | GA             | TC             | CT             | AA             | CC             | GG             | AA              | AA              | CC              | AA              | CC              |
| FAR    | LTM.3663      | AA                                    | TT              | GG              | AA              | TT              | GG                            | AA             | AA              | GG             | TT              | TT            | GG             | GG             | TT             | CC             | CA             | CC             | GG             | AA              | AA              | CC              | AA              | CC              |
| FAR    | LTM.3664      | AG                                    | TC              | AG              | GA              | TT              | GG                            | AA             | AA              | GG             | TT              | TT            | GA             | GA             | TC             | CT             | AA             | CC             | GG             | AG              | AA              | CC              | AA              | CC              |
| FAR    | LTM.3667      | AG                                    | 0               | AG              | GA              | TT              | GT                            | AA             | AA              | GG             | TT              | TT            | AA             | AA             | CC             | CC             | AA             | CC             | GG             | AA              | AA              | CC              | AA              | 0               |
| FAR    | LTM.3668      | AA                                    | 0               | GG              | AA              | TT              | GG                            | 0              | AA              | 0              | TT              | TC            | AA             | AA             | CC             | CC             | AA             | 0              | GG             | AA              | 0               | 0               | AA              | CC              |
| FAR    | LTM.3670      | AA                                    | TT              | GG              | AA              | TT              | GG                            | AA             | AA              | GG             | TT              | TT            | GA             | GA             | TC             | CC             | AA             | CC             | GG             | GG              | AA              | CC              | AA              | CC              |
| FAR    | LTM.3672      | AG                                    | TC              | AG              | GA              | TT              | GG                            | AA             | AA              | GG             | TT              | TT            | AA             | AA             | CC             | CC             | AA             | CC             | GG             | AA              | AA              | CC              | AA              | CC              |
| FAR    | LTM.3673      | AA                                    | 0               | GG              | AA              | TT              | GG                            | AA             | AA              | GG             | TT              | TC            | AA             | AA             | CC             | CC             | AA             | CC             | GG             | AA              | AA              | CC              | AA              | CC              |
| FAR    | LTM.3674      | AA                                    | TT              | GG              | AA              | TT              | GT                            | AA             | AA              | GG             | TT              | TT            | AA             | AA             | CC             | CC             | AA             | CC             | GG             | AA              | AA              | CC              | AA              | CC              |
| FAR    | LTM.3675      | AA                                    | TT              | GG              | AA              | TT              | GG                            | AA             | AA              | GG             | TT              | TC            | AA             | AA             | CC             | CC             | AA             | CC             | GG             | AA              | AA              | CC              | AA              | CC              |
| FAR    | LTM.3677      | AA                                    | TT              | GG              | AA              | TT              | GG                            | AA             | AA              | GG             | TT              | TT            | AA             | AA             | CC             | CC             | AA             | CC             | GG             | AA              | AA              | CC              | AA              | CC              |
| FAR    | LTM.3678      | AG                                    | TC              | AG              | GA              | TT              | GG                            | AA             | AA              | GG             | TT              | TT            | AA             | AA             | CC             | CC             | AA             | CC             | GG             | AG              | AA              | CC              | AA              | CC              |
| FAR    | LTM.3680      | AG                                    | TC              | AG              | GA              | TT              | GG                            | AA             | AA              | GG             | TT              | TT            | GA             | GA             | TC             | CT             | CA             | CC             | GG             | AG              | AA              | CC              | AA              | CC              |
| FAR    | LTM.3682      | AA                                    | TT              | GG              | AA              | TT              | GG                            | AA             | AA              | GG             | TT              | TT            | AA             | AA             | CC             | CC             | AA             | CC             | GG             | AA              | AA              | 0               | AA              | CC              |
| FAR    | LTM.3683      | AA                                    | TT              | GG              | AA              | TT              | GG                            | AA             | AA              | GG             | TT              | TT            | AA             | AA             | CC             | CC             | AA             | CC             | GG             | AA              | AA              | CC              | AG              | CC              |
| FAR    | LTM.3688      | AA                                    | 0               | GG              | AA              | TT              | GG                            | AA             | TA              | GG             | TT              | TT            | AA             | AA             | TC             | CT             | AA             | CC             | GG             | AA              | AA              | 0               | AA              | CC              |
| FAR    | LTM.3691      | AA                                    | TT              | GG              | AA              | TT              | GG                            | AA             | A               | GG             | TT              | TT            | AA             | AA             | CC             | CC             | AA             | CC             | GG             | AA              | AA              | CC              | AA              | CC              |
| FAR    | LTM.3692      | AA                                    | TT              | GG              | AA              | TT              | GG                            | AA             | TA              | GG             | CT              | TT            | AA             | AA             | CC             | CC             | AA             | CC             | GG             | AG              | AA              | CC              | AA              | CC              |
| FAR    | LTM.3695      | AA                                    | TT              | GG              | AA              | TT              | GG                            | AA             | TA              | GG             | TT              | TT            | GG             | GA             | TT             | CT             | AA             | CC             | GG             | AA              | AA              | CC              | AA              | CC              |
| FAR    | LTM.3696      | AA                                    | TT              | GG              | AA              | TT              | GG                            | AA             | TA              | GG             | TT              | TT            | AA             | AA             | CC             | CC             | AA             | CC             | GG             | AA              | AA              | CC              | AA              | CC              |
| FAR    | LTM.3697      | AG                                    | 0               | AG              | GA              | TT              | GG                            | AA             | AA              | CG             | CT              | TT            | GA             | GA             | TT             | CT             | AA             | CC             | GG             | AA              | AA              | CC              | AA              | CC              |
| FAR    | LTM.3698      | AA                                    | TT              | AG              | GA              | TT              | TT                            | AA             | AA              | GG             | TT              | TT            | AA             | AA             | CC             | CC             | AA             | CC             | GG             | AA              | AA              | CC              | AA              | CC              |
| FAR    | LTM.3699      | AG                                    | TC              | AG              | GA              | TT              | GT                            | AA             | AA              | CG             | CT              | TT            | AA             | GA             | TT             | CC             | AA             | CC             | GG             | AG              | AA              | CC              | AA              | CC              |
| FAR    | LTM.3702      | AG                                    | 0               | AG              | GA              | GT              | GG                            | AA             | AA              | 0              | CT              | TC            | AA             | AA             | CC             | CC             | AA             | CC             | GG             | AA              | AA              | 0               | AA              | CC              |
| FAR    | LTM.3703      | AA                                    | TT              | GG              | AA              | TT              | GG                            | AA             | AA              | GG             | TT              | TT            | GA             | GA             | TC             | CC             | AA             | CC             | GG             | AA              | AA              | CC              | AG              | CC              |
| FAR    | LTM.3707      | AA                                    | TT              | GG              | AA              | TT              | GT                            | AA             | AA              | GG             | TT              | TT            | AA             | AA             | CC             | CC             | AA             | CC             | GG             | AG              | AA              | CC              | AA              | CC              |
| FAR    | LTM.3978      | AA                                    | TT              | GG              | AA              | TT              | GG                            | AA             | AA              | CC             | TT              | TT            | AA             | AA             | TC             | CC             | AA             | CC             | GG             | AA              | AA              | CC              | AA              | CC              |

|     |          |    |    |    |    |    |    |    |    |    |    |    |    |    |    |    |    |    |    |    |    |    |    |    |
|-----|----------|----|----|----|----|----|----|----|----|----|----|----|----|----|----|----|----|----|----|----|----|----|----|----|
| FAR | LTM.3979 | AA | TT | GG | AA | TT | GG | AA | AA | GG | CT | TT | GA | GA | TC | CC | AA | CC | GG | AA | AA | CC | AA | CC |
| FAR | LTM.3980 | AA | TT | GG | AA | TT | GT | AA | TA | GG | TT | TT | AA | AA | CC | CC | AA | CC | GG | AA | AA | CC | AA | CC |
| FAR | LTM.3981 | AA | TT | GG | AA | TT | GG | AA | TA | CG | CT | TT | AA | AA | CC | CC | AA | CC | GG | AA | AA | CC | AA | CC |
| FAR | LTM.3982 | AA | TT | GG | AA | TT | GG | AA | AA | GG | TT | TT | AA | AA | CC | CC | CA | CC | GG | AA | AA | CC | AG | CC |
| FSC | LTM.2012 | AG | TC | AA | GG | GG | TT | 0  | TA | CC | CC | TC | GG | GG | TC | TT | AA | GG | AA | AG | GG | TT | GG | CT |
| FSC | LTM.1726 | AG | TC | AA | GG | GG | TT | 0  | TT | CC | CC | CC | GG | GG | TT | TT | CA | GG | AA | AG | GG | TT | AG | TT |
| FSC | LTM.1727 | GG | CC | AA | GG | GG | GT | AA | TT |    | CC | CC | GG | GG | TT | TT | CC | GG | AA | AG | GG | TT | GG | CC |
| FSC | LTM.1728 | GG | CC | AA | GG | GG | TT | 0  | TT | CC | CC | TC | GG | GA | TC | TT | CC | CG | GG | GG | GG | TT | AG | CT |
| FSC | LTM.1729 | GG | CC | AA | GG | GG | TT | AA | TT | CC | CC | CC | GG | GG | TT | TT | CC | GG | AA | AA | GG | TT | GG | CT |
| FSC | LTM.1730 | GG | CC | AA | GG | GG | TT | GG | TT | CC | CC | TC | GG | GG | TT | TT | CC | CG | AA | AG | GG | TT | GG | TT |
| FSC | LTM.1731 | GG | CC | AA | GG | GG | TT | GG | TT | CC | CC | CC | GG | GA | TT | TT | CC | CG | AA | GG | GG | TT | GG | TT |
| FSC | LTM.1732 | GG | TC | AA | GG | GG | TT | 0  | TT | CC | CC | TT | GG | GA | TT | TT | CC | CG | AG | GG | GA | TT | GG | TT |
| FSC | LTM.1733 | AG | TC | AA | GG | GG | TT | GG | TT | CC | CC | CC | GG | GA | TT | TT | CA | CG | AA | AG | GG | CC | AG | TT |
| FSC | LTM.1734 | GG | CC | AA | GG | GG | TT | GG | TT | CC | CC | TC | GG | GG | TT | TT | CC | CG | AG | GG | GG | TT | GG | TT |
| FSC | LTM.2191 | GG | TC | AA | GG | GG | TT | 0  | TT | CC | CC | CC | GG | GG | TT | TT | CC | GG | AG | AG | GG | TT | GG | CT |
| FSC | LTM.2192 | GG | CC | AA | GG | GG | TT | GG | TT | CC | CC | TC | GG | GA | TC | TT | CC | GG | AA | AG | GG | TT | GG | TT |
| FSC | LTM.1749 | AG | TC | AA | GG | GG | GT | AA | TT | CC | CC | TC | GG | GG | TT | CT | CC | GG | AA | GG | GG | TC | GG | TT |
| FSC | LTM.1750 | GG | CC | AA | GG | GG | TT | GG | TT | CC | CC | TC | GG | GG | TT | CC | CC | GG | AG | GG | GA | CC | GG | TT |
| FSC | LTM.1751 | GG | CC | AA | GG | GG | TT | GG | 0  | 0  | CT | CC | GG | GG | TT | TT | CA | CC | AG | GG | AA | TC | AG | TT |
| FSC | LTM.1752 | GG | CC | AA | GG | GG | GT | GA | 0  | 0  | CC | CC | 0  | AA | TC | TT | 0  | GG | GG | AG | GG | TT | AG | TT |
| FSC | LTM.1754 | GG | CC | AA | GG | GG | TT | AA | TT | CC | CC | CC | GG | GG | TT | TT | CA | GG | AG | GG | GG | TT | GG | TT |
| FSC | LTM.1755 | GG | CC | AA | GG | GG | TT | GG | TA | CC | CC | TC | GA | GG | TT | TT | CC | CG | AA | GG | GG | TT | GG | CT |
| FSC | LTM.1756 | GG | CC | AA | GG | GG | GT | GG | TT | CC | CT | CC | GG | GG | TC | TT | CA | GG | AG | GG | GA | CC | GG | CT |
| FSC | LTM.1757 | GG | CC | AA | GG | GG | TT | GG | 0  | CC | CT | CC | GG | GG | TT | TT | CA | CG | AA | AG | GG | TC | GG | CT |
| FSC | LTM.1758 | AG | TC | AG | GA | GT | TT | GG | TT | CC | CC | TC | GG | GA | TT | TT | CA | GG | AG | GG | GG | TC | GG | TT |
| FSC | LTM.1759 | GG | CC | AA | GG | GG | TT | 0  | TT | 0  | CC | CC | GG | GA | TT | CT | AA | GG | AA | AG | GG | 0  | GG | TT |
| FSC | LTM.1760 | GG | CC | AA | GG | GG | TT | AA | TT | CG | CT | TC | GG | GG | TT | CT | CC | CC | AA | GG | GG | TC | AG | TT |
| FSC | LTM.1761 | GG | CC | AG | GA | GT | TT | 0  | TT | 0  | CC | TC | GG | GG | TT | TT | CA | GG | AG | AG | GG | 0  | GG | CT |
| FSC | LTM.1762 | GG | CC | AA | GG | GG | GG | GG | TT | CC | CC | CC | GG | GA | TT | TT | CA | CG | AA | GG | GG | TT | GG | TT |
| FSC | LTM.1763 | GG | CC | AA | GG | GG | GT | GA | TA | 0  | CC | TC | GG | GG | TT | TT | CC | CG | AG | AA | GG | TC | GG | TT |
| FSC | LTM.1764 | GG | CC | AA | GG | GG | TT | GG | TA | 0  | CC | CC | GG | GG | TT | TT | CC | 0  | AG | GG | GG | 0  | GG | TT |
| FSC | LTM.1765 | GG | CC | AA | GG | GG | TT | AA | TT | CC | CC | CC | GG | GG | TT | TT | CC | CG | AG | GG | GA | 0  | GG | TT |
| FSC | LTM.1766 | AG | 0  | AA | GG | GG | TT | AA | TT | CC | CC | CC | GG | GA | TC | CT | CC | GG | AG | GG | 0  | 0  | GG | CT |
| FSC | LTM.1768 | AG | 0  | AA | GG | GG | TT | GG | TT | CC | CC | TC | GG | GG | TC | TT | 0  | GG | AG | GG | GG | 0  | GG | TT |
| FSC | LTM.1769 | GG | 0  | AA | GG | GG | TT | 0  | TA | CC | CC | CC | GG | GG | TT | TT | 0  | GG | AG | AG | GG | 0  | AG | CT |
| FSC | LTM.1770 | GG | CC | AA | GG | GG | GT | GG | TA | 0  | CC | CC | GG | GG | TT | TT | CA | CG | GG | GG | GA | 0  | AG | CC |
| FSC | LTM.1771 | GG | CC | AA | GG | GG | GT | 0  | TA | 0  | CC | TC | 0  | GA | TT | TT | CC | 0  | AA | GG | AA | 0  | AG | TT |
| FSC | LTM.1772 | GG | CC | AA | GG | GG | TT | AA | TT | CC | CC | CC | GG | GG | TT | TT | CC | CG | AG | GG | GA | TC | GG | TT |
| ALP | LTM.1806 | GG | CC | AA | GG | GG | TT | GG | TT | CC | CC | CC | GG | GG | TT | TT | CC | GG | AA | GG | GG | TC | GG | TT |
| ALP | LTM.1814 | GG | CC | AA | GG | GG | TT | GG | TT | CC | CC | CC | GG | GG | TT | TT | CC | GG | AA | GG | GG | TT | GG | TT |
| ALP | LTM.1816 | GG | CC | AA | GG | GG | TT | GG | TT | 0  | CC | TC | GG | GG | TT | CT | CC | GG | AA | GG | GG | TT | GG | TT |
| ALP | LTM.1817 | GG | CC | AA | GG | GG | TT | GG | TT | CC | CT | CC | GG | GG | TT | TT | CC | GG | AA | GG | GG | TT | GG | TT |
| ALP | LTM.1818 | GG | CC | AA | GG | GG | TT | GG | TT | CC | CC | CC | AA | GA | TT | TT | CC | GG | AA | GG | GG | CC | GG | TT |
| ALP | LTM.1820 | GG | CC | AA | GG | GG | TT | GG | TT | CC | CT | CC | GG | GG | TT | TT | CC | GG | AA | GG | GG | TT | GG | TT |
| ALP | LTM.1823 | GG | CC | AA | GG | GG | TT | GG | TT | 0  | CC | CC | GA | GG | TT | TT | CC | CG | AA | GG | GG | 0  | GG | TT |
| ALP | LTM.1825 | GG | CC | AA | GG | GG | TT | GG | TT | CC | CC | CC | GG | AA | TT | TT | CC | GG | AA | GG | GG | TT | GG | TT |
| ALP | LTM.1827 | GG | CC | AA | GG | GG | TT | GG | TT | CC | CC | CC | GG | AA | TT | TT | CC | GG | AA | GG | GG | TT | GG | TT |
| ALP | LTM.1828 | GG | CC | AA | GG | GG | TT | GG | TT | 0  | CC | CC | GG | GG | TT | TT | 0  | GG | AA | GG | 0  | 0  | GG | CT |
| ALP | LTM.2772 | GG | CC | AA | GG | GG | TT | GG | TT | CC | CC | CC | GG | GG | TT | TT | CC | CG | AA | GG | GG | TT | GG | TT |
| ALP | LTM.2773 | GG | CC | AA | GG | GG | TT | GG | TT | CC | CC | TC | GG | GG | TC | TT | CC | GG | AA | GG | GG | TT | GG | TT |
| ALP | LTM.2774 | GG | CC | AA | GG | GG | TT | GG | TT | CC | CC | TC | GA | GA | CC | TT | CA | CG | AA | GG | GG | TT | GG | TT |
| ALP | LTM.2775 | GG | CC | AA | GG | GG | TT | GG | TT | CC | CC | CC | GA | AA | TC | TT | CC | CC | AA | GG | GG | TT | GG | TT |
| ALP | LTM.2776 | GG | CC | AA | GG | GG | TT | GG | TT | CC | CC | CC | GA | GA | TT | CT | CC | CG | AA | GG | GG | TT | GG | TT |
| ALP | LTM.3106 | GG | CC | AA | GG | GG | TT | GG | TT | 0  | CC | CC | GG | GG | TT | TT | CC | GG | AA | GG | GG | 0  | GG | TT |
| ALP | LTM.3107 | GG | CC | AA | GG | GG | TT | GG | TT | CC | CC | CC | GG | GG | TT | TT | CC | GG | AA | GG | GG | TT | GG | TT |
| ALP | LTM.3108 | GG | 0  | AA | GG | GG | TT | 0  | TT | 0  | CC | CC | GG | GG | TC | TT | 0  | 0  | AA | GG | 0  | 0  | GG | TT |
| ALP | LTM.3109 | GG | CC | AA | GG | GG | TT | GG | TT | CC | CC | CC | GG | GG | TC | TT | CC | CC | AA | GG | GG | TT | GG | TT |
| ALP | LTM.3110 | GG | CC | AA | GG | GG | TT | GG | TT | CC | CC | CC | GG | GG | TT | TT | 0  | GG | AA | GG | GG | TT | GG | TT |
| ALP | LTM.3112 | GG | CC | AA | GG | GG | TT | GG | TT | CC | CC | CC | GG | GG | TT | CT | CC | GG | AG | GG | GG | TT | GG | TT |
| ALP | LTM.3116 | GG | CC | AA | GG | GG | TT | GG | TT | CC | CC | CC | GG | GG | TT | TT | CC | GG | AA | AG | GG | TT | GG | TT |
| ALP | LTM.3122 | GG | CC | AA | GG | GG | TT | GG | TT | CC | CC | TC | GG | GG | TT | TT | CA | CC | AA | GG | GG | TT | GG | TT |
| ALP | LTM.3199 | GG | CC | AA | GG | GG | TT | GG | TT | CC | CC | CC | GG | GG | TC | CT | CC | GG | AG | GG | GG | TT | GG | TT |
| ALP | LTM.3207 | GG | CC | AA | GG | GG | TT | GG | TT | CC | CC | CC | GG | AA | TT | TT | CC | GG | AA | AG | GG | TT | GG | TT |
| ALP | LTM.3228 | GG | CC | AA | GG | GG | TT | GG | TT | CC | CC | TC | GG | GG | TT | CT | CC | GG | AA | AG | GG | TT | GG | TT |
| ALP | LTM.3253 | GG | CC | AA | GG | GG | TT | GG | TT | 0  | CC | CC | GG | GG | TC | TT | CC | GG | AA | GG | GG | TT | GG | TT |
| ALP | LTM.3262 | GG | CC | AA | GG | GG | TT | GG | TT | CC | CC | TC | GG | GG | TT | CT | CC | GG | AA | GG | GG | TT | GG | TT |

**Table S8.** Variants at two genotyped SNPs (4:5,457,584 and 4:5,460,551) showing perfect association with winter coat color in the mountain hare, in other *Lepus* species and several other mammals (from Ensembl).

| <b>Species</b>                                              | <b>4:5,457,584</b> | <b>4:5,460,551</b> |
|-------------------------------------------------------------|--------------------|--------------------|
| mountain hare ( <i>L. timidus</i> ); winter-white           | T                  | C                  |
| mountain hare ( <i>L. timidus</i> ); winter-grey            | C                  | T                  |
| Iberian hare ( <i>L. granatensis</i> )                      | C                  | T                  |
| European brown hare ( <i>L. europaeus</i> ); Iberia         | T/C                | T/C                |
| European brown hare ( <i>L. europaeus</i> ); central Europe | T                  | C                  |
| snowshoe hare ( <i>L. americanus</i> )                      | T                  | C                  |
| black-tailed jackrabbit ( <i>L. californicus</i> )          | T                  | C                  |
| broom hare ( <i>L. castroviejoi</i> )                       | T                  | C                  |
| rabbit ( <i>Oryctolagus cuniculus</i> )                     | T                  | C                  |
| mouse                                                       |                    | C                  |
| pika                                                        |                    | C                  |
| horse                                                       |                    | C                  |
| sheep                                                       |                    | C                  |
| goat                                                        |                    | C                  |
| pig                                                         |                    | C                  |
| human                                                       |                    | C                  |



**Table S9.** Gene expression analyses. **(A)** Sequences of primers used in quantitative PCR (qPCR) and amplification efficiencies. **(B)** Raw threshold cycle ( $C_t$ ) values for the *Agouti-HC* isoform and the reference genes, *ACTB* and *SDHA*, in skin sampled at three stages of the autumn molt (early, intermediate, late). qPCR reactions of samples marked with the asterisks were run using undiluted cDNA (2-fold dilution was used for remaining ones).

**A)**

| Primer          | Sequence (5'-3')       | Efficiency [%]         | PCR product [bp] |
|-----------------|------------------------|------------------------|------------------|
| LTM_agouti_hc_F | GGTCATCAGTGGGTTTCTCC   | 100% ( $R^2 = 0.932$ ) | 164              |
| LTM_agouti_hc_R | CTCTGCTCTGGCTTCCCTTA   |                        |                  |
| LTM_actb_F      | GAAGATCTGGCACCACACCTTC | 118% ( $R^2 = 0.924$ ) | 162              |
| LTM_actb_R      | CCTGGATGGCCACGTACATG   |                        |                  |
| LTM_sdha_F      | CCCTTGTAGTTGGTAGGAATGC | 88% ( $R^2 = 0.971$ )  | 181              |
| LTM_sdha_R      | CCCGACAAGGATCACGTCTA   |                        |                  |

**B)**

| Molt stage    | Sample   | RIN | $C_t$ <i>Agouti</i> | $C_t$ <i>ACTB</i>   | $C_t$ <i>SDHA</i>   |
|---------------|----------|-----|---------------------|---------------------|---------------------|
| EARLY         | FAR3978  | 9.7 | 24.60, 24.46, 24.49 | 16.05, 16.18, 16.11 | 22.29, 22.18, 22.28 |
|               | FAR3979* | 8.4 | 35.41 - -           | 15.06, 15.01, 15.02 | 21.64, 21.22, 21.46 |
|               | FAR3981* | 9.8 | 35.73, 35.09, 34.84 | 15.61, 15.50, 16.26 | 21.09, 21.19, 21.28 |
|               | AFR2772  | 7.8 | 24.56, 24.59, 25.02 | 16.81, 16.87, 17.05 | 23.99, 24.03, 24.24 |
|               | SUI3112  | 8.1 | 23.96, 23.83, 23.80 | 17.16, 17.11, 17.08 | 22.84, 22.88, 22.80 |
|               | SUI3113  | 8.8 | 24.19, 23.66, 23.96 | 16.12, 16.12, 16.14 | 22.70, 22.85, 23.12 |
|               | SUI3114  | 9.5 | 27.24, 27.10, 26.89 | 17.95, 18.06, 17.86 | 24.55, 24.52, 24.47 |
|               | SUI3116  | 8.0 | 26.62, 26.42, 26.83 | 16.86, 16.62, 16.56 | 23.41, 23.41, 23.49 |
| INTER-MEDIATE | FAR3978  | 7.7 | 27.39, 26.82, 27.05 | 17.76, 17.28, 17.78 | 25.43, 25.10, 25.55 |
|               | FAR3979* | 7.1 | 34.16, 34.79, 32.66 | 14.70, 14.77, 14.89 | 22.04, 21.91, 22.12 |
|               | FAR3981  | 9.7 | - - -               | - - -               | - - -               |
|               | AFR2772  | 8.8 | 29.65, 29.89, 30.18 | 16.76, 16.88, 16.71 | 23.56, 23.75, 24.10 |
|               | SUI3112  | 8.1 | 24.91, 24.86, 24.75 | 16.39, 16.35, 16.36 | 22.45, 22.92, 22.28 |
|               | SUI3113  | 8.9 | 24.41, 24.26, 24.41 | 16.63, 16.58, 16.53 | 23.27, 23.29, 23.48 |
|               | SUI3114  | 9.2 | 26.81, 26.61, 26.58 | 17.15, 17.06, 16.93 | 23.60, 23.70, 23.64 |
|               | SUI3116  | 9.8 | 25.48, 25.80, 26.26 | 15.73, 15.40, 15.39 | 21.76, 21.69, 21.79 |
| LATE          | FAR3978  | 7.8 | 28.46, 28.69, 28.33 | 17.48, 17.36, 17.61 | 24.66, 24.61, 24.74 |
|               | FAR3979* | 9.0 | 34.83, 32.37, 33.87 | 14.88, 14.66, 14.61 | 21.31, 21.08, 21.20 |
|               | FAR3981  | 9.8 | - - -               | - - -               | - - -               |
|               | AFR2772  | 7.5 | 27.87, 28.07, 28.10 | 16.37, 16.52, 16.49 | 23.15, 23.26, 23.60 |
|               | SUI3112  | 8.4 | 24.74, 24.99, 24.75 | 16.16, 16.05, 15.96 | 22.41, 22.11, 22.30 |
|               | SUI3113  | 8.7 | 27.91, 27.76, 28.07 | 16.19, 16.20, 16.34 | 23.10, 23.17, 23.22 |
|               | SUI3114  | 9.0 | 26.41, 26.37, 26.27 | 17.23, 17.28, 17.13 | 23.75, 23.74, 23.67 |
|               | SUI3116  | 8.9 | 25.36, 25.56, 26.07 | 16.35, 16.20, 16.63 | 22.74, 22.95, 23.16 |

**Table S10.** Probability of fixation of a rare allele due to genetic drift alone after 65 years of evolution (33-65 generations, generation time of two or one year, respectively) under three demographic scenarios, based on 10,000 SLiM simulations. All scenarios consider an initial allele frequency of  $1/2N_F$ , where  $N_F$  is the effective population size of the founder (diploid individuals;  $2N_F$  report haploid numbers): 1 – mode of the HPD of the ABC inference; 2 – lower 95% HPD of the ABC inference, 3 – historical record. Three growth rate parameters were used: 1 – mode of the HPD of ABC inference; 2 – lower 95% HPD interval of the ABC inference; 3 – parameter value implying growth from  $N_F$  to the lowest 95% HPD interval of the current effective population size in Faroese hares, inferred with ABC. ABC inference is shown in Table S4. The P-value indicates the proportion of simulations where fixation was achieved after  $n$  generations.

| <b>Scenario</b> | <b>Founder size (<math>2N_F</math>)</b> | <b>Initial allele freq</b> | <b>Growth rate</b> | <b>P-value (33 gen)</b> | <b>P-value (65 gen)</b> |
|-----------------|-----------------------------------------|----------------------------|--------------------|-------------------------|-------------------------|
| 1               | 20                                      | 1/20                       | 0.08               | 0.001                   | 0.001                   |
| 2               | 6                                       | 1/6                        | 0.16               | 0.032                   | 0.032                   |
| 3               | 8                                       | 1/8                        | 0.10               | 0.037                   | 0.039                   |

**Table S11.** Demographic parameters inferred with G-PhoCS for the history of divergence between **(A)** the mountain hare (MTH) and the Iberian hare (IBH), and **(B)** the mountain hare (MTH) and the European brown hare (EBH). For conversion of raw estimates, mutation rate  $\mu = 2.8 \times 10^{-9}$  substitutions/site/generation and generation time of two years were used. Mean values of estimated parameters are presented with 95% HPD intervals in parentheses.

**A)**

| <b>G-PhoCS parameter</b> | <b>Demographic parameter (95% HPD interval)</b> |
|--------------------------|-------------------------------------------------|
| theta MTH                | 302,893 (297,910 - 307,805) diploid individuals |
| theta IBH                | 181,768 (178,425 - 185,125) diploid individuals |
| theta ANC                | 316,277 (307,424 - 325,346) diploid individuals |
| Tau                      | 929,964 (910,339 - 948,925) generations         |
| m IBH → MTH              | 0.010 (0.004 – 0.016) migrants/generation       |
| m MTH → IBH              | 0.190 (0.176 – 0.205) migrants/generation       |

**B)**

| <b>G-PhoCS parameter</b> | <b>Demographic parameter (95% HPD interval)</b> |
|--------------------------|-------------------------------------------------|
| theta MTH                | 258,446 (252,298 - 264,617) diploid individuals |
| theta EBH                | 290,491 (283,049 - 298,025) diploid individuals |
| theta ANC                | 286,732 (274,707 - 298,795) diploid individuals |
| tau                      | 1,017,571 (990,225 – 1,045,596) generations     |
| m EBH → MTH              | 0.079 (0.065 – 0.095) migrants/generation       |
| m MTH → EBH              | 0.283 (0.251 – 0.315) migrants/generation       |

## REFERENCES FOR SI

1. Meyer M, Kircher M (2010) Illumina sequencing library preparation for highly multiplexed target capture and sequencing. *Cold Spring Harb Protoc* 2010;pdb prot5448.
2. Seixas FA (2017) Genome admixture with massive mitochondrial DNA introgression in hares (*Lepus* spp.): the relative roles of demography and natural selection. PhD (University of Porto and University of Montpellier, Porto and Montpellier).
3. Seixas FA, Boursot P, Melo-Ferreira J (2018) The genomic impact of historical hybridization with massive mitochondrial DNA introgression. *Genome Biol* 19:91.
4. Jones MR, et al. (2018) Adaptive introgression underlies polymorphic seasonal camouflage in snowshoe hares. *Science* 360:1355-1358.
5. Bolger AM, Lohse M, Usadel B (2014) Trimmomatic: a flexible trimmer for Illumina sequence data. *Bioinformatics* 30:2114-2120.
6. Li H, Durbin R (2009) Fast and accurate short read alignment with Burrows-Wheeler transform. *Bioinformatics* 25:1754-1760.
7. Matthee CA, van Vuuren BJ, Bell D, Robinson TJ (2004) A molecular supermatrix of the rabbits and hares (Leporidae) allows for the identification of five intercontinental exchanges during the Miocene. *Syst Biol* 53:433-447.
8. Carneiro M, et al. (2014) Rabbit genome analysis reveals a polygenic basis for phenotypic change during domestication. *Science* 345:1074-1079.
9. McKenna A, et al. (2010) The Genome Analysis Toolkit: a MapReduce framework for analyzing next-generation DNA sequencing data. *Genome Res* 20:1297-1303.
10. Li H, et al. (2009) The Sequence Alignment/Map format and SAMtools. *Bioinformatics* 25:2078-2079.
11. Martin M (2010) Cutadapt removes adapter sequences from high-throughput sequencing reads. *EMBnet.journal* 17:10-12.
12. Kofler R, et al. (2011) PoPoolation: A Toolbox for Population Genetic Analysis of Next Generation Sequencing Data from Pooled Individuals. *PLoS ONE* 6:e15925.
13. Korneliussen TS, Albrechtsen A, Nielsen R (2014) ANGSD: Analysis of Next Generation Sequencing Data. *BMC Bioinformatics* 15:356.
14. Chang CC, et al. (2015) Second-generation PLINK: rising to the challenge of larger and richer datasets. *Gigascience* 4.
15. Vieira FG, Lassalle F, Korneliussen TS, Fumagalli M (2016) Improving the estimation of genetic distances from Next-Generation Sequencing data. *Biol J Linn Soc* 117:139-149.
16. Fumagalli M, Vieira FG, Linderroth T, Nielsen R (2014) ngsTools: methods for population genetics analyses from next-generation sequencing data. *Bioinformatics* 30:1486-1487.
17. Lefort V, Desper R, Gascuel O (2015) FastME 2.0: A Comprehensive, Accurate, and Fast Distance-Based Phylogeny Inference Program. *Mol Biol Evol* 32:2798-2800.
18. Pickrell JK, Pritchard JK (2012) Inference of population splits and mixtures from genome-wide allele frequency data. *PLoS Genet* 8:e1002967.
19. Sukumaran J, Holder MT (2010) DendroPy: a Python library for phylogenetic computing. *Bioinformatics* 26:1569-1571.
20. Beaumont MA, Zhang W, Balding DJ (2002) Approximate Bayesian computation in population genetics. *Genetics* 162:2025-2035.
21. Marboutin E, Peroux R (1995) Survival pattern of European hare in a decreasing population. *J Appl Ecol* 32:809-816.

22. Kofler R, Pandey RV, Schlötterer C (2011) PoPoolation2: Identifying differentiation between populations using sequencing of pooled DNA samples (Pool-Seq). *Bioinformatics* 27:3435-3436.
23. Ferretti L, Ramos-Onsins SE, Perez-Enciso M (2013) Population genomics from pool sequencing. *Mol Ecol* 22:5561-5576.
24. Pool JE, Hellmann I, Jensen JD, Nielsen R (2010) Population genetic inference from genomic sequence variation. *Genome Res* 20:291-300.
25. Kofler R, Betancourt AJ, Schlötterer C (2012) Sequencing of Pooled DNA Samples (Pool-Seq) Uncovers Complex Dynamics of Transposable Element Insertions in *Drosophila melanogaster*. *PLoS Genet* 8:e1002487.
26. Boitard S, Rodríguez W, Jay F, Mona S, Austerlitz F (2016) Inferring Population Size History from Large Samples of Genome-Wide Molecular Data - An Approximate Bayesian Computation Approach. *PLoS Genet* 12:e1005877.
27. Excoffier L, Dupanloup I, Huerta-Sánchez E, Sousa VC, Foll M (2013) Robust Demographic Inference from Genomic and SNP Data. *PLoS Genet* 9:e1003905.
28. Wegmann D, Leuenberger C, Neuenschwander S, Excoffier L (2010) ABCtoolbox: a versatile toolkit for approximate Bayesian computations. *BMC Bioinformatics* 11:116.
29. Mevik B-H, Wehrens R (2007) The pls Package: Principal Component and Partial Least Squares Regression in R. *J Stat Softw* 18:23.
30. Leuenberger C, Wegmann D (2010) Bayesian Computation and Model Selection Without Likelihoods. *Genetics* 184:243.
31. Yi X, et al. (2010) Sequencing of 50 Human Exomes Reveals Adaptation to High Altitude. *Science* 329:75.
32. Layer RM, Chiang C, Quinlan AR, Hall IM (2014) LUMPY: a probabilistic framework for structural variant discovery. *Genome Biol* 15:R84.
33. Rausch T, et al. (2012) DELLY: structural variant discovery by integrated paired-end and split-read analysis. *Bioinformatics* 28:i333-i339.
34. Chen K, et al. (2009) BreakDancer: an algorithm for high-resolution mapping of genomic structural variation. *Nat Methods* 6:677-681.
35. Robinson JT, et al. (2011) Integrative genomics viewer. *Nature Biotechnol* 29:24-26.
36. Thorvaldsdóttir H, Robinson JT, Mesirov JP (2013) Integrative Genomics Viewer (IGV): high-performance genomics data visualization and exploration. *Brief Bioinform* 14:178-192.
37. Dabney J, et al. (2013) Complete mitochondrial genome sequence of a Middle Pleistocene cave bear reconstructed from ultrashort DNA fragments. *Proc Natl Acad Sci USA* 110:15758-15763.
38. Gonzalez JR, et al. (2007) SNPAssoc: an R package to perform whole genome association studies. *Bioinformatics* 23:644-645.
39. Ferreira MS, et al. (2017) The transcriptional landscape of seasonal coat colour moult in the snowshoe hare. *Mol Ecol* 26:4173-4185.
40. Matz MV, Wright RM, Scott JG (2013) No Control Genes Required: Bayesian Analysis of qRT-PCR Data. *PLoS ONE* 8:e71448.
41. Tajima F (1989) Statistical method for testing the neutral mutation hypothesis by DNA polymorphism. *Genetics* 123:585-595.
42. Boitard S, et al. (2013) Pool-hmm: a Python program for estimating the allele frequency spectrum and detecting selective sweeps from next generation sequencing of pooled samples. *Mol Ecol Res* 13:337-340.
43. Boitard S, Schlötterer C, Nolte V, Pandey RV, Futschik A (2012) Detecting Selective Sweeps from Pooled Next-Generation Sequencing Samples. *Mol Biol Evol* 29:2177-2186.

44. Chantry-Darmon C, et al. (2006) A first-generation microsatellite-based integrated genetic and cytogenetic map for the European rabbit (*Oryctolagus cuniculus*) and localization of angora and albino. *Anim Genet* 37:335-341.
45. Pavlidis P, Zivkovic D, Stamatakis A, Alachiotis N (2013) SweeD: likelihood-based detection of selective sweeps in thousands of genomes. *Mol Biol Evol* 30:2224-2234.
46. Ewing G, Hermisson J (2010) MSMS: a coalescent simulation program including recombination, demographic structure and selection at a single locus. *Bioinformatics* 26:2064-2065.
47. Haller BC, Messer PW (2019) SLiM 3: Forward Genetic Simulations Beyond the Wright–Fisher Model. *Mol Biol Evol* 36:632-637.
48. Martin SH, Van Belleghem SM (2017) Exploring Evolutionary Relationships Across the Genome Using Topology Weighting. *Genetics* 206:429-438.
49. Martin SH, Davey JW, Jiggins CD (2015) Evaluating the Use of ABBA–BABA Statistics to Locate Introgressed Loci. *Mol Biol Evol* 32:244-257.
50. Feder JL, et al. (2005) Mayr, Dobzhansky, and Bush and the complexities of sympatric speciation in *Rhagoletis*. *Proc Natl Acad Sci USA* 102 Suppl 1:6573-6580.
51. Stamatakis A (2015) Using RAxML to Infer Phylogenies. *Curr Protoc Bioinformatics* 51:6.14.11-16.14.14.
52. Gronau I, Hubisz MJ, Gulko B, Danko CG, Siepel A (2011) Bayesian inference of ancient human demography from individual genome sequences. *Nat Genet* 43:1031-1034.
53. Rambaut A, Drummond AJ (2014) Tracer v1.6, Available from <http://beast.community/>.
54. Gillespie JH, Langley CH (1979) Are evolutionary rates really variable? *J Mol Evol* 13:27-34.
